# Supplementary material for: Cardiovascular risk factors and COVID-19 outcomes in hospitalised patients: a prospective cohort study
Source: PubMed Central journal article supplement (PMC7902321; doi:10.1136/bmjopen-2020-045482), 2021-02-22
Supplement: bmjopen-2020-045482.draft_revisions.pdf [file bmjopen-2020-045482.draft_revisions.pdf]

# BMJ Open

BMJ Open is committed to open peer review. As part of this commitment we make the peer review history of every article we publish publicly available.

When an article is published we post the peer reviewers' comments and the authors' responses online. We also post the versions of the paper that were used during peer review. These are the versions that the peer review comments apply to.

The versions of the paper that follow are the versions that were submitted during the peer review process. They are not the versions of record or the final published versions. They should not be cited or distributed as the published version of this manuscript.

BMJ Open is an open access journal and the full, final, typeset and author-corrected version of record of the manuscript is available on our site with no access controls, subscription charges or pay-per-view fees (<http://bmjopen.bmj.com>).

If you have any questions on BMJ Open's open peer review process please email [info.bmjopen@bmj.com](mailto:info.bmjopen@bmj.com)

# BMJ Open

## Cardiovascular risk factors are independently associated with COVID-19 mortality: a prospective cohort study

|                               |                                                                                                                                                                                                                                                                                                                                                                                                                                                                                                                                                                                                                                                                                                                                                                                                                                                                                                                                                                                                                                                                                                          |
|-------------------------------|----------------------------------------------------------------------------------------------------------------------------------------------------------------------------------------------------------------------------------------------------------------------------------------------------------------------------------------------------------------------------------------------------------------------------------------------------------------------------------------------------------------------------------------------------------------------------------------------------------------------------------------------------------------------------------------------------------------------------------------------------------------------------------------------------------------------------------------------------------------------------------------------------------------------------------------------------------------------------------------------------------------------------------------------------------------------------------------------------------|
| Journal:                      | <i>BMJ Open</i>                                                                                                                                                                                                                                                                                                                                                                                                                                                                                                                                                                                                                                                                                                                                                                                                                                                                                                                                                                                                                                                                                          |
| Manuscript ID                 | bmjopen-2020-045482                                                                                                                                                                                                                                                                                                                                                                                                                                                                                                                                                                                                                                                                                                                                                                                                                                                                                                                                                                                                                                                                                      |
| Article Type:                 | Original research                                                                                                                                                                                                                                                                                                                                                                                                                                                                                                                                                                                                                                                                                                                                                                                                                                                                                                                                                                                                                                                                                        |
| Date Submitted by the Author: | 06-Oct-2020                                                                                                                                                                                                                                                                                                                                                                                                                                                                                                                                                                                                                                                                                                                                                                                                                                                                                                                                                                                                                                                                                              |
| Complete List of Authors:     | Collard, Didier; Amsterdam University Medical Centers, Vascular Medicine<br>Nurmohamed, Nick; Amsterdam University Medical Centers, Vascular Medicine<br>Kaiser, Yannick; Amsterdam University Medical Centers, Vascular Medicine<br>Reeskamp, Laurens; Amsterdam University Medical Centers, Vascular Medicine<br>Dormans, Tom; Zuyderland Medical Centre Sittard-Geleen, Department of Intensive Care<br>Moeniralam, Hazra; Sint Antonius Hospital, Internal Medicine<br>Simsek, Suat; Noordwest Ziekenhuisgroep, Department of Internal Medicine<br>Douma, Renee; Flevoziekenhuis, Internal Medicine<br>Eerens, Annet ; Treant Healthcare Group, Oncology<br>Reidinga, Auke; Martini Ziekenhuis, Intensive Care<br>Elbers, Paul; Amsterdam UMC - Locatie VUMC, Department of Intensive Care<br>Beudel, Martijn; Amsterdam University Medical Centers, Neurology<br>Vogt, Liffert; Amsterdam University Medical Centers, Internal Medicine<br>Stroes, Erik; Amsterdam University Medical Centers, Vascular Medicine<br>van den Born, Bert-Jan; Amsterdam University Medical Centers, Vascular Medicine |
| Keywords:                     | COVID-19, Hypertension < CARDIOLOGY, General diabetes < DIABETES & ENDOCRINOLOGY, INTENSIVE & CRITICAL CARE, Ischaemic heart disease < CARDIOLOGY, Vascular medicine < INTERNAL MEDICINE                                                                                                                                                                                                                                                                                                                                                                                                                                                                                                                                                                                                                                                                                                                                                                                                                                                                                                                 |
|                               |                                                                                                                                                                                                                                                                                                                                                                                                                                                                                                                                                                                                                                                                                                                                                                                                                                                                                                                                                                                                                                                                                                          |

SCHOLARONE™  
Manuscripts

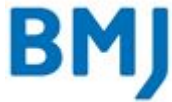

I, the Submitting Author has the right to grant and does grant on behalf of all authors of the Work (as defined in the below author licence), an exclusive licence and/or a non-exclusive licence for contributions from authors who are: i) UK Crown employees; ii) where BMJ has agreed a CC-BY licence shall apply, and/or iii) in accordance with the terms applicable for US Federal Government officers or employees acting as part of their official duties; on a worldwide, perpetual, irrevocable, royalty-free basis to BMJ Publishing Group Ltd ("BMJ") its licensees and where the relevant Journal is co-owned by BMJ to the co-owners of the Journal, to publish the Work in this journal and any other BMJ products and to exploit all rights, as set out in our [licence](#).

The Submitting Author accepts and understands that any supply made under these terms is made by BMJ to the Submitting Author unless you are acting as an employee on behalf of your employer or a postgraduate student of an affiliated institution which is paying any applicable article publishing charge ("APC") for Open Access articles. Where the Submitting Author wishes to make the Work available on an Open Access basis (and intends to pay the relevant APC), the terms of reuse of such Open Access shall be governed by a Creative Commons licence – details of these licences and which [Creative Commons](#) licence will apply to this Work are set out in our licence referred to above.

Other than as permitted in any relevant BMJ Author's Self Archiving Policies, I confirm this Work has not been accepted for publication elsewhere, is not being considered for publication elsewhere and does not duplicate material already published. I confirm all authors consent to publication of this Work and authorise the granting of this licence.

1  
2  
3 **Cardiovascular risk factors are independently associated with COVID-19 mortality: a**  
4  
5 **prospective cohort study**  
6  
7

8 **Authors:** Didier Collard MD<sup>1\*</sup>, Nick S. Nurmohamed MD<sup>1,2\*</sup>, Yannick Kaiser MD<sup>1\*</sup>, Laurens  
9 F. Reeskamp MD<sup>1</sup>, Tom Dormans MD PhD<sup>3</sup>, Hazra Moeniralam MD PhD<sup>4</sup>, Suat Simsek MD  
10 PhD<sup>5</sup>, Renée A. Douma MD PhD<sup>6</sup>, Annet Eerens<sup>7</sup>, Auke C. Reidinga MD<sup>8</sup>, Paul Elbers MD  
11 PhD<sup>9</sup>, Martijn Beudel MD PhD<sup>10</sup>, Liffert Vogt MD PhD<sup>11</sup>, Erik S.G. Stroes MD PhD<sup>1</sup>, Bert-  
12 Jan H. van den Born MD PhD<sup>1,12</sup>  
13  
14

15 \*These authors contributed equally to this work  
16  
17

18 **Affiliations**

19 <sup>1</sup> Amsterdam UMC, University of Amsterdam, Department of Vascular Medicine, Amsterdam  
20 Cardiovascular Sciences, Amsterdam, the Netherlands

21 <sup>2</sup> Amsterdam UMC, Vrije Universiteit Amsterdam, Department of Cardiology, Amsterdam  
22 Cardiovascular Sciences, Amsterdam, the Netherlands

23 <sup>3</sup> Zuyderland Medisch Centrum, Department of Intensive Care, Sittard-Geleen, the  
24 Netherlands

25 <sup>4</sup> St. Antonius Hospital, Department of Internal Medicine, Nieuwegein, the Netherlands

26 <sup>5</sup> Northwest Clinics, Department of Internal Medicine, Alkmaar, The Netherlands

27 <sup>6</sup> Flevohospital, Department of Internal Medicine, Almere, The Netherlands

28 <sup>7</sup> Treant Healthcare Group, Department of Oncology, Hoogeveen, The Netherlands

29 <sup>8</sup> Martini Hospital, Intensive Care Unit, Groningen, The Netherlands

30 <sup>9</sup> Amsterdam UMC, Vrije Universiteit Amsterdam, Department of Intensive Care, Amsterdam  
31 Amsterdam, the Netherlands

32 <sup>10</sup> Amsterdam UMC, University of Amsterdam, Department of Neurology, Amsterdam  
33 Neuroscience Institute, Amsterdam, the Netherlands

34 <sup>11</sup> Amsterdam UMC, University of Amsterdam, Department of Nephrology, Amsterdam  
35 Cardiovascular Sciences, Amsterdam, the Netherlands

36 <sup>12</sup> Amsterdam UMC, University of Amsterdam, Department of Public Health, Amsterdam, the  
37 Netherlands  
38  
39

40 **Keywords:** COVID-19, SARS-CoV-2, CVD, hypertension, diabetes, mortality, ICU-  
41 admission  
42

43 **Word count:** 3562 (manuscript, including references), 291 (abstract)

44 **Figures:** tables: 1, figures: 1, supplementary figures: 1, supplementary tables: 2  
45

46 **Address for correspondence**

47 Dr. Bert-Jan H. van den Born

48 Department of Vascular Medicine, Amsterdam University Medical Centers, University of  
49 Amsterdam  
50

51 Meibergdreef 9, 1105 AZ Amsterdam, the Netherlands

52 Email: [b.j.vandenborn@amsterdamumc.nl](mailto:b.j.vandenborn@amsterdamumc.nl), tel: +3120-5666612  
53  
54

## Abstract

**Objectives:** Recent reports suggest a high prevalence of hypertension and diabetes in COVID-19 patients, but the role of cardiovascular disease (CVD) risk factors in the clinical course of COVID-19 is unknown. We evaluated the time-to-event relationship between hypertension, dyslipidemia, diabetes, and COVID-19 outcomes.

**Design:** We analyzed data from the prospective Dutch COVID-PREDICT cohort, an ongoing prospective study of patients admitted for COVID-19 infection.

**Setting:** Patients from 8 participating hospitals, including two university hospitals from the COVID-PREDICT cohort were included.

**Participants:** Admitted, adult patients with a positive COVID-19 polymerase chain reaction (PCR) or high suspicion based on CT-imaging of the thorax. Patients were followed for major outcomes during hospitalization. CVD risk factors were established via home medication lists and divided in antihypertensives, lipid lowering therapy, and antidiabetics.

**Primary and secondary outcomes measures:** The primary outcome was mortality during the first 21 days following admission, secondary outcomes consisted of ICU-admission and ICU-mortality. Kaplan-Meier and Cox-regression analyses were used to determine the association with CVD risk factors.

**Results:** We included 1604 patients with a mean age of  $66 \pm 15$  of whom 60.5% were men. Antihypertensives, lipid lowering therapy, and antidiabetics were used by 45%, 34.7%, and 22.1% of patients. After adjustment for age and sex, the presence of  $\geq 2$  risk factors was associated with increased mortality risk (HR 1.52, 95%CI 1.15-2.02), but not with ICU-admission. Moreover, the use of  $\geq 2$  antidiabetics and  $\geq 2$  antihypertensives was associated with mortality independent of age and sex with HRs of respectively 2.09 (95%CI 1.55-2.80) and 1.46 (95%CI 1.11-1.91).

1  
2  
3 **Conclusions:** The accumulation of hypertension, dyslipidemia and diabetes leads to a  
4  
5 stepwise increased risk for short-term mortality in hospitalized COVID-19 patients  
6  
7 independent of age and sex. Further studies investigating how these risk factors  
8  
9 disproportionately affect COVID-19 patients are warranted.  
10  
11  
12  
13

#### 14 **Strengths and limitations of this study**

- 15  
16  
17 • While previous data reported a high prevalence of CVD risk factors in COVID-19  
18  
19 patients, this study investigated whether diabetes, dyslipidemia and hypertension predict  
20  
21 adverse outcomes.  
22  
23
- 24 • This study is limited by the use of medication as surrogate for cardiovascular risk factors  
25
- 26 • The causality of the investigated risk factors remains to be addressed in future studies.  
27  
28  
29  
30  
31  
32  
33  
34  
35  
36  
37  
38  
39  
40  
41  
42  
43  
44  
45  
46  
47  
48  
49  
50  
51  
52  
53  
54  
55  
56  
57  
58  
59  
60

## Introduction

The global spread of coronavirus disease 2019 (COVID-19), first identified in Wuhan, China, in December 2019, has ignited an unprecedented ongoing global pandemic.(1) Although most infected individuals experience only mild symptoms that do not require hospitalization, the absolute number of patients requiring hospital admission is staggering. Risk stratification of these patients is crucial to optimize the use of hospital resources.(2) Several associations with adverse outcomes in COVID-19 patients have been identified, including factors that also predispose to cardiovascular disease (CVD), such as older age, male sex, hypertension, overweight and diabetes.(3,4) Furthermore, individuals with overt CVD appear to be affected more seriously by COVID-19 infection.(5)

The association between cardiovascular events and infectious diseases is well established. Examples include the increased prevalence of myocardial infarction during influenza pandemics,(6) and the higher number of cardiac complications in patients hospitalized for community-acquired pneumonia.(7) However, there are conflicting data whether the presence of shared CVD and COVID-19 risk factors merely reflect advanced age and history of ischemic heart disease in patients who develop severe infection, or are independently associated with adverse outcomes in the COVID-19 patient population.(4,8) For example, a higher than expected prevalence of diabetes, hypertension, obesity, and history of CVD was reported during the previous outbreak Middle East respiratory syndrome coronavirus (MERS-CoV), which shares many similarities with COVID-19.(9)

In the present study, we hypothesized that three major risk independent CVD risk factors are associated with adverse outcomes in COVID-19 patients. To this end, we evaluated the time-to-event relationship between COVID-19 disease outcomes and a history of medication use for hypertension, dyslipidemia, and diabetes mellitus in a large prospective Dutch cohort of hospitalized COVID-19 patients.

## Patients and Methods

### *Study design*

COVID-PREDICT is a Dutch multicenter initiative to collect data of hospitalized patients with confirmed COVID-19. For this study, patients from 8 participating hospitals, including two university hospitals were included. All hospitalized patients >18 years with a positive COVID-19 polymerase chain reaction (PCR) or high suspicion based on CT-imaging of the thorax were included.<sup>(10)</sup> A waiver for the use hospital record data was obtained from the Medical Ethical Committees of the participating centers. Patients were given the opportunity to opt out.

The collected data was updated with daily reports on vital signs, laboratory results, complications, and clinical outcomes. In addition, the use of antihypertensive, lipid-lowering, and/or antidiabetic medication was determined from the home medication list. These were used as surrogates for hypertension, dyslipidemia, and diabetes. Antihypertensive medication was categorized as using either 0, 1, more than 1 of the following categories: non-dihydropyridine calcium channel blockers (CCBs), renin angiotensin system (RAS)-inhibitors (either angiotensin receptor antagonist or angiotensin receptor blockers) and diuretics (either loop diuretics, thiazide or thiazide like diuretics or potassium channel blockers). Lipid-lowering therapy was classified as the use of statin, ezetimibe, fibrates, or PCSK9-inhibitors. Antidiabetic medication was classified as using either 0, 1 or more than 1 of the following classes: metformin, sulfonylurea derivates, GLP-1 agonists, DDP4- inhibitors, SGLT-2 inhibitors, and insulin. Obesity was defined as a BMI >30 kg/m. Smoking was categorized into current or non/former smoker. The combined use of beta-blockers and platelet aggregation inhibitors was used as a surrogate for history of ischemic cardiac disease.



1  
2  
3 Outcomes were determined 3 and 6 weeks after admission, or earlier when the patient died or  
4 was discharged from the hospital.  
5  
6  
7  
8  
9

### 10 *Primary and secondary outcomes*

11  
12 The primary outcome consisted of overall mortality during the first 21 days following  
13 admission. Overall mortality was defined as either mortality during admission or discharge for  
14 palliative care, either at home or a palliative care facility. If the patient was discharged alive  
15 from the hospital and no further follow-up data was available, we considered the patient to be  
16 event free for the whole study period. Secondary outcomes consisted of ICU-admission and  
17 mortality in the subset of patients who had been admitted to the ICU.  
18  
19  
20  
21  
22  
23  
24  
25  
26  
27

### 28 *Statistical analysis*

29  
30 For the analysis, we included all consecutive patients who were primarily admitted to one of  
31 the participating centers between February 27<sup>th</sup> and July 4<sup>th</sup> 2020. Patients with unknown  
32 medication use prior to hospitalization were excluded. Patients were categorized based on the  
33 presence of either 0, 1 or more than 1 medication based cardiovascular risk factor. Baseline  
34 characteristics were depicted as mean  $\pm$  standard deviation for normally distributed data,  
35 nonnormally as median [interquartile range], or as number (percentage) for categorical  
36 variables, and were compared using the appropriate tests (ANOVA, Kruskal-Wallis, chi-  
37 squared). The relationship between outcomes and cumulative cardiovascular risk factors was  
38 determined using a Kaplan-Meier analysis. We then determined hazard ratios using Cox-  
39 regression after correction for age and sex, and with additional correcting for obesity,  
40 smoking and history of ischemic cardiac disease. For ICU-mortality, a landmark analysis was  
41 performed starting from ICU-admission. Next, with Cox-regression models using the same  
42 covariates we determined the association between mortality and the use of antihypertensive,  
43  
44  
45  
46  
47  
48  
49  
50  
51  
52  
53  
54  
55  
56  
57  
58  
59  
60

1  
2  
3 lipid-lowering, and antidiabetic drugs. All statistical analyses were conducted with R version  
4  
5 3.6.3 (R Foundation, Vienna, Austria) using the Survival version 3.1-11 and Tableone version  
6  
7 0.11.1 packages.  
8  
9

## 11 **Results**

### 12 *Patient characteristics*

13  
14  
15  
16  
17 Between February 27<sup>th</sup> 2020 and July 4<sup>th</sup> 2020, a total of 1614 patients with a confirmed  
18  
19 COVID-19 infection were primarily admitted to one of the participating centers in the  
20  
21 Netherlands. After exclusion of patients with an unknown medication list, we included 1604  
22  
23 patients in the present analysis. Their mean age was 66±15 years, 67.6% were Caucasian, and  
24  
25 60.5% were men. 6.5% of the admitted patients were current smokers. The majority of  
26  
27 admitted patients (924, 57.6%) used some form of cardiovascular medication prior to  
28  
29 admission. Antihypertensive medication was used by 721 (45.0%) patients, of whom 497  
30  
31 (68.9%) used RAS-inhibitors, 256 (35.5%) calcium-antagonists, and 374 (51.9%) diuretics.  
32  
33 Lipid-lowering therapy was used by 557 (34.7%) patients, predominantly consisting of statins  
34  
35 (540, 96.9%). In total, 354 (22.1%) patients used antidiabetic medication, of whom 282  
36  
37 (79.7%) used metformin and 137 patients (38.7%) insulin. 167 patients (10.4%) used the  
38  
39 combination of a beta-blocker and a platelet aggregation inhibitor, reflecting a history of  
40  
41 ischemic cardiac disease. In the subset of 566 patients for whom a more detailed medical  
42  
43 history was available, we found a similar prevalence of cardiovascular disease, with 13.1% of  
44  
45 the patients having a history of coronary artery disease, 3.7% of heart failure, 7.4% of stroke  
46  
47 and 1.6% of peripheral arterial disease (see Supplement 3).  
48  
49  
50  
51  
52  
53  
54  
55  
56  
57  
58  
59  
60

### *Cardiovascular risk factors as markers for mortality and ICU-admission*

In the entire cohort, 308 (19.2%) of the patients died or were discharged for palliative care. In total 273 (17.0%) of the patients were admitted to the ICU, of whom 78 died. 1100 (68.6%) patients were discharged alive from the hospital, 50 (3.1%) were transferred to another hospital. The remaining patients were still admitted to the hospital at time of the data collection (126; 7.9%) or follow-up data was not available yet (20; 1.25%). The Kaplan-Meier analysis showed a significant association between cardiovascular risk factors and overall mortality ( $p < 0.0001$ ; Figure 1A) and a trend towards increased ICU-mortality ( $p = 0.055$ ; Supplement 1). We found no association between cardiovascular risk factors and ICU-admission ( $p = 0.85$ ; Figure 1B). In Cox-regression analysis, a 5-year age increase was associated with a HR of 1.37 (CI 1.31-1.45) for mortality, while there was no significant association with sex (HR 1.02, CI 0.81-1.28). The presence of two or more cardiovascular risk factors was significantly associated with overall mortality (HR 1.52, 95%CI 1.15-2.02), but not with ICU-admission or ICU-mortality (Table 2). After additional correction for smoking, obesity, and the combined use of beta-blockers and platelet aggregation inhibitors the presence of two or more risk factors remained associated with mortality (HR 1.38, 95%CI 1.02-1.86, Supplement 2).

### *Individual risk factors*

In the Cox-regression models corrected for age and sex, we observed that the use of two or more different classes of antihypertensives and antidiabetics were associated with 21-day mortality, with HR of respectively of 1.46 (95%CI 1.11-1.91) and 2.09 (95%CI 1.55-2.80). Similarly, we found a HR of 1.25 (95%CI 0.99-1.56) for the use of lipid-lowering medication. Additional correction for smoking, obesity and the combined use of beta-blockers and antiplatelet medication attenuated the association between the use of BP-lowering and lipid-

1  
2  
3 lowering medication towards 1.33 (95%CI 1.01-1.76) and 1.14 (95%CI 0.89-1.45) for the use  
4  
5 of  $\geq 2$  BP-lowering drugs or  $\geq 1$  lipid-lowering drug respectively. The association between the  
6  
7 use of 2 or more glucose-lowering medications and mortality remained significant with an  
8  
9 adjusted HR of 1.93 (95%CI 1.43-2.62; Supplementary table 2).  
10  
11  
12  
13

## 14 **Discussion**

15  
16 In a large Dutch cohort of hospitalized COVID-19 patients, we observed that patients with  
17  
18 more than one risk factor for CVD had a 52% higher 3-week mortality risk, independent of  
19  
20 age and sex. In addition, our data show that the use of two or more antihypertensives or  
21  
22 antidiabetics, or one lipid-lowering drug is associated with adverse outcomes in COVID-19  
23  
24 patients. Patients using two or more antidiabetic drugs had the highest mortality risk. This  
25  
26 suggests that patients with a history of or at high risk for cardiovascular disease have an  
27  
28 increased risk for adverse COVID-19 disease outcomes.  
29  
30  
31  
32  
33

34  
35 The prevalence of medication use for CVD risk factors was higher in COVID-19 patients than  
36  
37 in previously described cohorts representative for the general Dutch population of similar  
38  
39 age.(11) Wuhan-based COVID-19 cohorts were the first to describe a higher mortality in  
40  
41 those with hypertension and diabetes.(12) However, the average age and reported prevalence  
42  
43 of CVD risk factors was much lower in these cohorts than in the present study.(4) The  
44  
45 increased case-fatality rate in Europe and the US compared with China may in part be  
46  
47 attributable to demographic differences in the COVID-19 infected population.(13) Recent  
48  
49 European and US-based cohorts indeed demonstrate a higher average age with a similar  
50  
51 distribution of hypertension and diabetes compared to our study, and also show a higher  
52  
53 mortality in COVID-19 patients with hypertension and diabetes.(14,15) In line with the  
54  
55 results from a large US-based cohort, we observed that age was significantly associated with  
56  
57  
58  
59  
60

1  
2  
3 mortality, while we found no significant difference in mortality between sexes.(16) This  
4 suggests that although men are more often hospitalized, there is no substantial difference in  
5 mortality after admission for severe COVID-19 infection. We add to these findings that the  
6 accumulation of CVD risk factors is associated with mortality, independent of age, sex,  
7 presence of coronary artery disease, smoking and obesity in hospitalized patients.  
8  
9

10  
11 Analogous to COVID-19, CVD risk factors are also prevalent among patients hospitalized for  
12 community-acquired pneumonia.(17) However, we observed a stronger association between  
13 hypertension, diabetes, dyslipidemia and mortality in COVID-19 patients compared with  
14 previous studies on community-acquired pneumonia, despite a similar prevalence of CVD  
15 risk factors.(18) In addition, these effects remained significant after correction for covariates  
16 such as smoking, obesity, and the use of beta-blockers and antiplatelet drugs as surrogate for a  
17 history of ischemic cardiac disease. This might suggest that CVD risk factors in COVID-19  
18 patients disproportionately affect the clinical course of COVID-19 patients compared to other  
19 infectious diseases. The present findings are comparable to the previous MERS-CoV  
20 outbreak, which also saw a preponderance of hypertension and diabetes in hospitalized  
21 patients.(9) Because both coronaviruses enter the cell through the angiotensin converting  
22 enzyme 2 (ACE2) receptor, a hypothesis has become that upregulation of ACE2 in patients  
23 with hypertension and/or diabetes facilitates transmission of the virus.(19–22) However,  
24 recent studies have shown no association between the use of RAS-medication and the disease  
25 course of COVID-19.(23,24) Furthermore, this theory does not explain the increased risk of  
26 mortality paired with other CVD risk factors in COVID-19 patients. An alternative  
27 explanation is that CVD risk factors predispose to myocardial injury in COVID-19 infected  
28 patients, contributing to a more severe clinical course.(25) Two recent studies revealed viral  
29 RNA in the myocardium of COVID-19 patients, suggesting that SARS-CoV-2 might infect  
30  
31  
32  
33  
34  
35  
36  
37  
38  
39  
40  
41  
42  
43  
44  
45  
46  
47  
48  
49  
50  
51  
52  
53  
54  
55  
56  
57  
58  
59  
60

1  
2  
3 the heart directly. It can be speculated that those with (pre-clinical) atherosclerosis are prone  
4  
5 to experience coronary ischemia from viral myocardial involvement.(26,27)  
6  
7  
8  
9

10 In our cohort of COVID-19 patients, the presence of diabetes had the strongest association  
11 with mortality and remained significant after correction for covariates such as smoking,  
12 obesity, and the use of beta-blockers and antiplatelet drugs as surrogate for coronary artery  
13 disease. We observed smaller effect sizes for the presence of hypertension and dyslipidemia.  
14 These findings might suggest that diabetes predisposes for adverse outcomes in COVID-19  
15 patients not only through its association with CVD, but potentially via other  
16 pathophysiological pathways specific to diabetes. A recent Chinese cohort showed diabetes to  
17 be associated with higher ICU-admission and more in-hospital mortality, but not  
18 independently of hypertension and history of CVD.(8) Interestingly, in those with diabetes,  
19 hypertension was associated with in-hospital death, independently of history of CVD, further  
20 supporting the additive effect of CVD risk factors on COVID-19 mortality. Nevertheless, it is  
21 hard to disentangle the precise relation based on epidemiological data. In line with current  
22 guidelines on CVD risk management, cardiovascular medication from different classes were  
23 often prescribed together in our cohort, also in patients with diabetes.(28) This makes it  
24 difficult to assess their separate contribution to mortality. It remains, therefore, unknown  
25 whether diabetes alone is associated with a higher risk of adverse outcomes or whether it is  
26 merely a reflection of increased vascular ageing in combination with the other risk  
27 factors.(29) In contrast to our results, the recent cohort of Cummings et al, found that among  
28 cardiovascular risk factors, only chronic cardiac disease was a strong predictor for hospital  
29 mortality, while smaller associations were found for other risk factors, including diabetes.(16)  
30 In line, a recent Italian cohort of hospitalized COVID-19 patients showed an increased  
31 prevalence of hypertension and diabetes amongst non-survivors, but only diabetes was an  
32  
33  
34  
35  
36  
37  
38  
39  
40  
41  
42  
43  
44  
45  
46  
47  
48  
49  
50  
51  
52  
53  
54  
55  
56  
57  
58  
59  
60

1  
2  
3 independent predictor after correction for other comorbidities.(30) In the present study, the  
4  
5 cumulative presence of CVD risk factors did not show an association with increased risk for  
6  
7 ICU-admission. This may have been influenced by selection prior to ICU admission, where  
8  
9 the presence of co-morbidity was taken into account in the shared decision-making process,  
10  
11 leading to a relative underrepresentation of patients with CV-risk factors.  
12  
13  
14  
15  
16

17 The present analysis has several limitations. First, data collection was based on data collection  
18  
19 forms of the WHO, which did not include detailed information on cardiovascular disease  
20  
21 history. For this reason, we relied on medication use as a surrogate marker for established  
22  
23 cardiovascular risk factors or disease, which has been used before in big cohort studies.(31)  
24  
25 Nevertheless, some of these drugs might have been prescribed for different indications.  
26  
27 Secondly, we only obtained follow-up during the first 21 days, however as depicted in the  
28  
29 Kaplan-Meier analysis, almost all events occurred during the first 14 days, in line with earlier  
30  
31 descriptions.(4) Finally, we cannot exclude that mortality in the current study is partially  
32  
33 caused by other factors than COVID-19. However, as we used 21-day mortality as our  
34  
35 primary outcome and only included patients admitted to the hospital with confirmed COVID-  
36  
37 19 infection, it is very likely that the majority of deaths were directly attributable to COVID-  
38  
39 19.  
40  
41  
42  
43  
44  
45  
46

47 In conclusion, the accumulation of CVD risk factors leads to a stepwise increased risk for  
48  
49 short-term mortality in hospitalized COVID-19 patients. Patients with diabetes had the  
50  
51 highest risk, followed by similar risks for hypertension and dyslipidemia. Mechanistic studies  
52  
53 investigating how CVD risk factors disproportionately affect COVID-19 patients compared to  
54  
55 other infectious diseases are warranted.  
56  
57  
58  
59  
60

## **Acknowledgements**

We would like to thank the CovidPredict consortium ([www.covidpredict.org](http://www.covidpredict.org)) for their efforts in providing the patient data.

## **Author contributions**

DC, NN, YK, LR, ES, BjdvdB, LV, MB, PE conceptualized and designed the study. DC, NN, YK, LR performed the data analysis. DC, NN, YK, ES, BjdvdB drafted the manuscript.

All authors have made substantial contributions to the following: (1) the conception and design of the study, or acquisition of data, or analysis and interpretation of data, (2) revising the manuscript critically for important intellectual content, (3) final approval of the version to be submitted.

## **Funding**

DC is supported by a ZonMW grant (project number: 10430022010002).

## **Competing interests**

N.S.N. and L.F.R. are co-founders of Lipid Tools. E.S.G.S. reports personal fees from Amgen, personal fees from Sanofi-Regeneron, personal fees from Esperion, grants from Athera, outside the submitted work.

## **Data availability statement**

The data that support the findings of this study are available from the corresponding author, upon reasonable request.



## References

1. World Health Organization. Coronavirus disease 2019 (COVID-19), situation report 92.
2. Lipsitch M, Swerdlow DL, Finelli L. Defining the Epidemiology of Covid-19 - Studies Needed. *N Engl J Med*. 2020 Mar;382(13):1194–6.
3. Wilkins JT, Ning H, Berry J, Zhao L, Dyer AR, Lloyd-Jones DM. Lifetime risk and years lived free of total cardiovascular disease. *JAMA*. 2012;308(17):1795–801.
4. Zhou F, Yu T, Du R, Fan G, Liu Y, Liu Z, et al. Clinical course and risk factors for mortality of adult inpatients with COVID-19 in Wuhan, China: a retrospective cohort study. *Lancet*. 2020;
5. Zheng YY, Ma YT, Zhang JY, Xie X. COVID-19 and the cardiovascular system. *Nat Rev Cardiol*. 2020 Mar;17:259–60.
6. Nguyen JL, Yang W, Ito K, Matte TD, Shaman J, Kinney PL. Seasonal influenza infections and cardiovascular disease mortality. *JAMA Cardiol*. 2016 Jun;1(3):274–81.
7. Corrales-Medina VF, Musher DM, Wells GA, Chirinos JA, Chen L, Fine MJ. Cardiac complications in patients with community-acquired pneumonia incidence, timing, risk factors, and association with short-term mortality. *Circulation*. 2012 Feb;125(6):773–81.
8. Shi Q, Zhang X, Jiang F, Zhang X, Hu N, Bimu C, et al. Clinical Characteristics and Risk Factors for Mortality of COVID-19 Patients With Diabetes in Wuhan, China: A Two-Center, Retrospective Study. *Diabetes Care*. 2020;43(7):1382–91.
9. Badawi A, Ryoo SG. Prevalence of comorbidities in the Middle East respiratory syndrome coronavirus (MERS-CoV): a systematic review and meta-analysis. *Int J Infect Dis*. 2016 Aug;49:129–33.
10. Bai HX, Hsieh B, Xiong Z, Halsey K, Choi JW, Tran TML, et al. Performance of

- 1  
2  
3 radiologists in differentiating COVID-19 from viral pneumonia on chest CT.  
4  
5 Radiology. 2020;200823.  
6  
7  
8 11. van Laer SD, Snijder MB, Agyemang C, Peters RJG, van den Born BJH. Ethnic  
9  
10 differences in hypertension prevalence and contributing determinants – the HELIUS  
11  
12 study. *Eur J Prev Cardiol*. 2018;25(18):1914–22.  
13  
14 12. Guan WJ, Ni ZY, Hu Y, Liang WH, Ou CQ, He JX, et al. Clinical Characteristics of  
15  
16 Coronavirus Disease 2019 in China. *N Engl J Med*. 2020;1–13.  
17  
18 13. Onder G, Rezza G, Brusaferro S. Case-Fatality Rate and Characteristics of Patients  
19  
20 Dying in Relation to COVID-19 in Italy. *JAMA - J Am Med Assoc*. 2020;2019:2019–  
21  
22 20.  
23  
24 14. Richardson S, Hirsch JS, Narasimhan M, Crawford JM, McGinn T, Davidson KW, et  
25  
26 al. Presenting Characteristics, Comorbidities, and Outcomes Among 5700 Patients  
27  
28 Hospitalized With COVID-19 in the New York City Area. *Jama*. 2020;10022:1–8.  
29  
30 15. Goyal P, Choi JJ, Pinheiro LC, Schenck EJ, Chen R, Jabri A, et al. Clinical  
31  
32 Characteristics of Covid-19 in New York City. *N Engl J Med*. 2020 Apr 17;  
33  
34 16. Cummings MJ, Baldwin MR, Abrams D, Jacobson SD, Meyer BJ, Balough EM, et al.  
35  
36 Epidemiology, clinical course, and outcomes of critically ill adults with COVID-19 in  
37  
38 New York City: a prospective cohort study. *Lancet [Internet]*. 2020;S0140-  
39  
40 6736(20)31189-2. Available from: [http://dx.doi.org/10.1016/S0140-6736\(20\)31189-2](http://dx.doi.org/10.1016/S0140-6736(20)31189-2)  
41  
42  
43 17. Corrales-Medina VF, Musher DM, Shachkina S, Chirinos JA. Acute pneumonia and  
44  
45 the cardiovascular system. *Lancet*. 2013;381(9865):496–505.  
46  
47  
48 18. Violi F, Cangemi R, Falcone M, Taliani G, Pieralli F, Vannucchi V, et al.  
49  
50 Cardiovascular complications and short-term mortality risk in community-acquired  
51  
52 pneumonia. *Clin Infect Dis*. 2017;64(11):1486–93.  
53  
54  
55 19. Fang L, Karakiulakis G, Roth M. Are patients with hypertension and diabetes mellitus  
56  
57  
58  
59  
60

- 1  
2  
3 at increased risk for COVID-19 infection? *Lancet Respir Med*. 2020 Apr;8(4):e21.  
4  
5  
6 20. Vaduganathan M, Vardeny O, Michel T, McMurray JJ V, Pfeffer MA, Solomon SD.  
7 Renin-Angiotensin-Aldosterone System Inhibitors in Patients with Covid-19. *N Engl J*  
8  
9  
10 Med. 2020 Mar;  
11  
12 21. Kuster GM, Pfister O, Burkard T, Zhou Q, Twerenbold R, Haaf P, et al. SARS-CoV2:  
13  
14 should inhibitors of the renin–angiotensin system be withdrawn in patients with  
15  
16  
17 COVID-19? *Eur Heart J*. 2020 Mar;  
18  
19 22. Danser AHHJ, Epstein M, Batlle D. Renin-Angiotensin System Blockers and the  
20  
21  
22 COVID-19 Pandemic: At Present There Is No Evidence to Abandon Renin-  
23  
24  
25 Angiotensin System Blockers. *Hypertension*. 2020 Mar;  
26  
27 23. Mackey K, King VJ, Gurley S, Kiefer M, Liederbauer E, Vela K, et al. Risks and  
28  
29  
30 Impact of Angiotensin-Converting Enzyme Inhibitors or Angiotensin-Receptor  
31  
32  
33 Blockers on SARS-CoV-2 Infection in Adults. *Ann Intern Med [Internet]*. 2020 May  
34  
35  
36 15; Available from: <https://doi.org/10.7326/M20-1515>  
37  
38 24. Mancia G, Rea F, Ludergnani M, Apolone G, Corrao G. Renin–angiotensin–  
39  
40  
41 aldosterone system blockers and the risk of COVID-19. *N Engl J Med*.  
42  
43  
44 2020;382(25):2431–40.  
45  
46 25. Shi S, Qin M, Shen B, Cai Y, Liu T, Yang F, et al. Association of Cardiac Injury with  
47  
48  
49 Mortality in Hospitalized Patients with COVID-19 in Wuhan, China. *JAMA Cardiol*.  
50  
51  
52 2020;  
53  
54 26. Wichmann D, Sperhake J-P, Lütgehetmann M, Steurer S, Edler C, Heinemann A, et al.  
55  
56  
57 Autopsy Findings and Venous Thromboembolism in Patients With COVID-19. *Ann*  
58  
59  
60 Intern Med [Internet]. 2020 May 6; Available from: <https://doi.org/10.7326/M20-2003>  
27. Schaller T, Hirschtbühl K, Burkhardt K, Braun G, Trepel M, Märkl B, et al. Postmortem  
Examination of Patients with COVID-19. *JAMA - J Am Med Assoc*.

- 1  
2  
3 2020;323(24):2518–20.  
4  
5  
6 28. The Task Force for the management of arterial hypertension of the European Society of  
7  
8 Cardiology (ESC) and the European Society of Hypertension (ESH). 2018 ESC/ESH  
9  
10 Guidelines for the management of arterial hypertension. *Eur Heart J*. 2018 Aug  
11  
12 25;39(33):3021–104.  
13  
14 29. Ungvari Z, Tarantini S, Donato AJ, Galvan V, Csiszar A. Mechanisms of vascular  
15  
16 aging. *Circ Res*. 2018;123(7):849–67.  
17  
18  
19 30. Iaccarino G, Grassi G, Borghi C, Ferri C, Salvetti M, Volpe M. Age and  
20  
21 Multimorbidity Predict Death Among COVID-19 Patients: Results of the SARS-RAS  
22  
23 Study of the Italian Society of Hypertension. *Hypertens (Dallas, Tex 1979)*.  
24  
25 2020;76(2):366–72.  
26  
27  
28 31. Attaei MW, Khatib R, McKee M, Lear S, Dagenais G, Igumbor EU, et al. Availability  
29  
30 and affordability of blood pressure-lowering medicines and the effect on blood pressure  
31  
32 control in high-income, middle-income, and low-income countries: an analysis of the  
33  
34 PURE study data. *Lancet Public Heal*. 2017;2(9):e411–9.  
35  
36  
37  
38  
39  
40  
41  
42  
43  
44  
45  
46  
47  
48  
49  
50  
51  
52  
53  
54  
55  
56  
57  
58  
59  
60

## Figure legends

### **Figure 1. Survival and time-to event analysis of cumulative cardiovascular risk factors on mortality and ICU-admission**

Kaplan-Meier analysis of hypertension, dyslipidemia and diabetes stratified into 0, 1 or more risk factors versus adverse clinical outcomes. Left panel (A) depicts mortality, right panel (B) ICU-admission. Log-rank test was used to test for differences between curves. RF, risk factor; ICU, intensive care unit.

**Table 1.** Baseline characteristics

|                                                      | Overall       | 0 RF          | 1 RF          | ≥2 RF         | p      |
|------------------------------------------------------|---------------|---------------|---------------|---------------|--------|
| n                                                    | 1604          | 680           | 400           | 524           |        |
| Age (mean (SD))                                      | 65.67 (15.06) | 58.59 (15.71) | 69.93 (13.01) | 71.62 (11.45) | <0.001 |
| Women                                                | 633 (39.5)    | 298 (43.8)    | 170 (42.5)    | 165 (31.5)    | <0.001 |
| Chronic cardiac disease                              | 467 (29.2)    | 71 (10.5)     | 117 (29.3)    | 279 (53.4)    | <0.001 |
| Hypertension                                         | 734 (46.0)    | 80 (11.8)     | 242 (60.8)    | 412 (78.8)    | <0.001 |
| Chronic pulmonary disease                            | 288 (18.0)    | 92 (13.6)     | 82 (20.6)     | 114 (21.9)    | <0.001 |
| Asthma                                               | 179 (11.2)    | 77 (11.4)     | 41 (10.3)     | 61 (11.7)     | 0.793  |
| Chronic kidney disease                               | 150 (9.4)     | 17 (2.5)      | 48 (12.0)     | 85 (16.3)     | <0.001 |
| Diabetes                                             | 411 (25.7)    | 19 (2.8)      | 66 (16.5)     | 326 (62.3)    | <0.001 |
| Malignant neoplasm                                   | 98 (6.2)      | 36 (5.3)      | 25 (6.3)      | 37 (7.1)      | 0.455  |
| Chronic hematologic disorder                         | 57 (3.6)      | 32 (4.7)      | 11 (2.8)      | 14 (2.7)      | 0.1    |
| Smoking                                              | 78 (6.5)      | 30 (6.0)      | 16 (5.4)      | 32 (7.8)      | 0.383  |
| Obesity                                              | 464 (30.8)    | 164 (26.1)    | 112 (29.4)    | 188 (37.8)    | <0.001 |
| Combined use of beta-blockers and antiplatelet drugs | 167 (10.4)    | 7 (1.0)       | 35 (8.8)      | 125 (23.9)    | <0.001 |
| Antihypertensive-Rx                                  |               |               |               |               | <0.001 |
| 0                                                    | 883 (55.0)    | 680 (100.0)   | 145 (36.2)    | 58 (11.1)     |        |
| 1                                                    | 377 (23.5)    | 0 (0.0)       | 141 (35.2)    | 236 (45.0)    |        |
| 2                                                    | 282 (17.6)    | 0 (0.0)       | 95 (23.8)     | 187 (35.7)    |        |
| ≥ 3                                                  | 62 (3.9)      | 0 (0.0)       | 19 (4.8)      | 43 (8.2)      |        |
| Lipid-lowering-Rx                                    |               |               |               |               | <0.001 |
| 0                                                    | 1047 (65.3)   | 0 (0.0)       | 296 (74.0)    | 89 (13.5)     |        |
| ≥ 1                                                  | 557 (34.7)    | 0 (0.0)       | 104 (26.0)    | 453 (86.5)    |        |
| Glucose-lowering-Rx                                  |               |               |               |               | <0.001 |
| 0                                                    | 1250 (77.9)   | 680 (100.0)   | 359 (89.8)    | 211 (40.3)    |        |
| 1                                                    | 170 (10.6)    | 0 (0.0)       | 23 (5.8)      | 147 (28.1)    |        |
| ≥ 2                                                  | 184 (11.5)    | 0 (0.0)       | 18 (4.5)      | 166 (31.7)    |        |

RF, risk factor; SD, standard deviation; IQR, interquartile range; Rx, medication. P-values indicate comparison between subgroups based on the presence of cumulative risk factors.

**Table 2.** Effect of cumulative cardiovascular risk factors on primary and secondary outcomes

|               | Cumulative risk factors | HR      | 95%CI |      | p     |
|---------------|-------------------------|---------|-------|------|-------|
| Mortality     | 0 RF                    | 1 (ref) |       |      |       |
|               | 1 RF                    | 1.04    | 0.76  | 1.43 | 0.786 |
|               | ≥2 RF                   | 1.52    | 1.15  | 2.02 | 0.004 |
| ICU admission | 0 RF                    | 1 (ref) |       |      |       |
|               | 1 RF                    | 1.11    | 0.80  | 1.53 | 0.534 |
|               | ≥2 RF                   | 1.15    | 0.85  | 1.56 | 0.355 |
| ICU-mortality | 0 RF                    | 1 (ref) |       |      |       |
|               | 1 RF                    | 0.86    | 0.46  | 1.60 | 0.625 |
|               | ≥2 RF                   | 1.52    | 0.90  | 2.55 | 0.115 |

Cox-regression for the effect of cumulative cardiovascular risk factors on mortality, ICU-admission and ICU-mortality, corrected for sex and age. HR, hazard ratio; CI, confidence interval; ICU, intensive care unit.

**Table 3.** Effect of antihypertensive, lipid-lowering, and antidiabetic medications on mortality

| <b>Mortality</b>       | <b>HR</b> | <b>95%CI</b> | <b>p</b> |
|------------------------|-----------|--------------|----------|
| 0 antihypertensive-Rx  | 1 (ref)   |              |          |
| 1 antihypertensive-Rx  | 1.08      | 0.81 1.43    | 0.597    |
| ≥2 antihypertensive-Rx | 1.46      | 1.11 1.91    | 0.006    |
| 0 lipid-lowering-Rx    | 1 (ref)   |              |          |
| ≥1 lipid-lowering-Rx   | 1.25      | 0.99 1.56    | 0.058    |
| 0 antidiabetic-Rx      | 1 (ref)   |              |          |
| 1 antidiabetic-Rx      | 1.34      | 0.97 1.85    | 0.077    |
| ≥2 antidiabetic-Rx     | 2.09      | 1.55 2.80    | <0.001   |

Cox-regression for the effect of the number of antihypertensive, lipid-lowering and antidiabetic drug classes on mortality, with correction for age and sex. Rx, medication; HR, hazard ratio; CI, confidence interval.



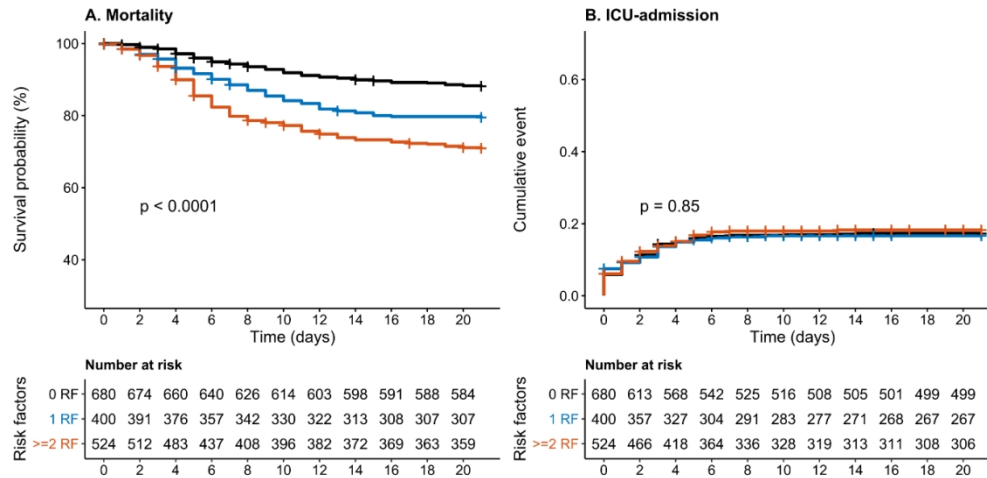

Figure 1. Kaplan-Meier analysis of hypertension, dyslipidemia and diabetes stratified into 0, 1 or more risk factors versus adverse clinical outcomes. Left panel (A) depicts mortality, right panel (B) ICU-admission. Log-rank test was used to test for differences between curves. RF, risk factor; ICU, intensive care unit.

117x58mm (300 x 300 DPI)

Supplement 1. Survival analysis for ICU-mortality

Figure S1. Survival analysis of cumulative cardiovascular risk factors for ICU-mortality

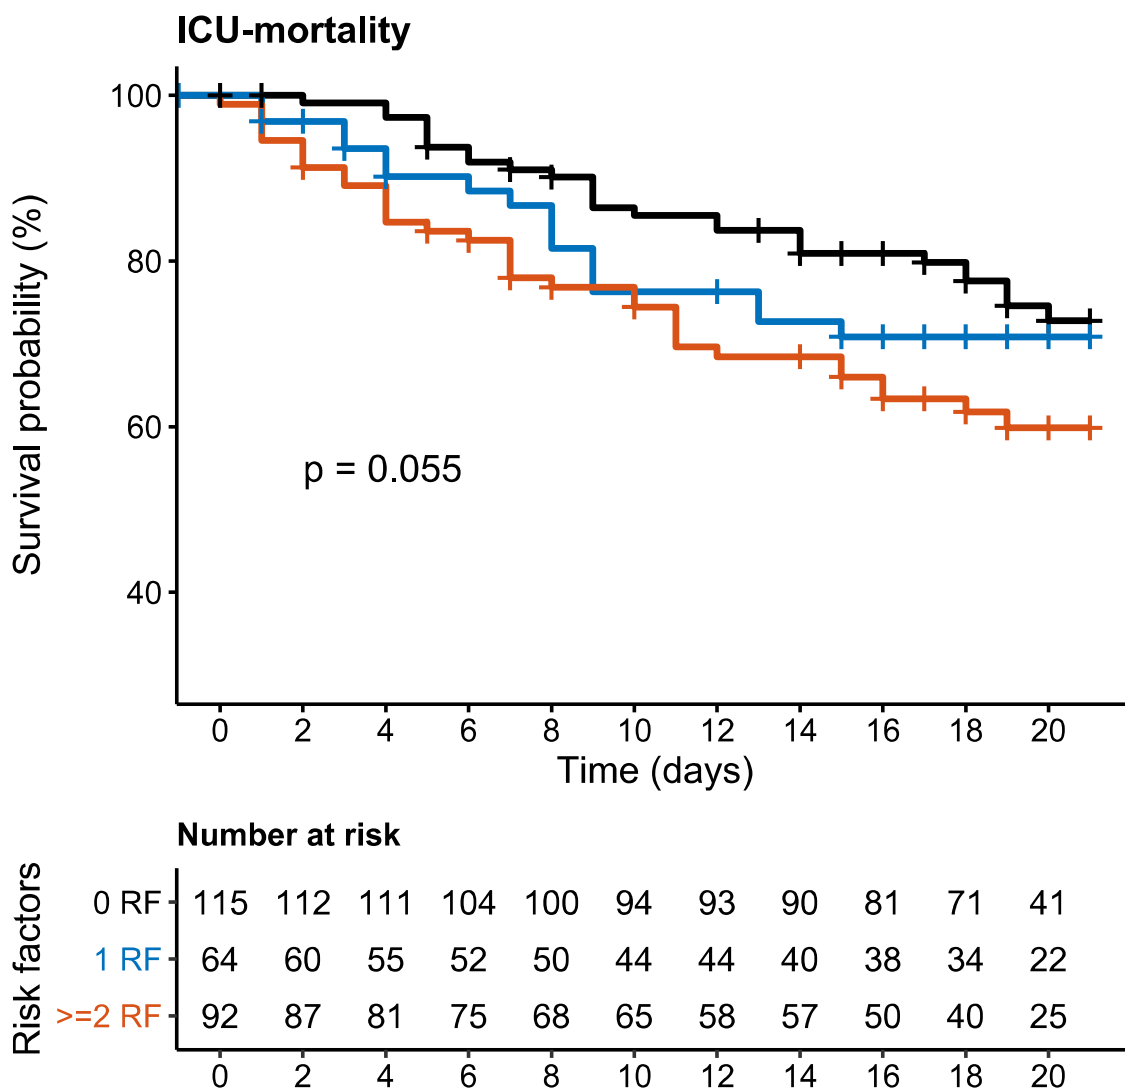

Kaplan-Meier analysis of hypertension, dyslipidemia and diabetes stratified into 0, 1 or more risk factors versus adverse clinical outcomes for mortality in patients admitted to the ICU. Log-rank test was used to test for differences between curves. RF, risk factor; ICU, intensive care unit.

1  
2  
3 **Supplement 2: Cox-regression models with additional correction for smoking, obesity**  
4 **and the use of both a beta-blocker and antiplatelet drug.**  
5  
6  
7  
8

9 We performed an additional analysis for the association between the cardiovascular risk  
10 factors and mortality with correction for smoking, obesity and the use of both a beta-blocker  
11 and antiplatelet drug. Data for smoking status was missing for 22.7% of the patients, data for  
12 obesity was missing for 9.2% of the patients. Imputation for these covariates was performed  
13 using the Multivariate Imputation by Chained (mice) package version 3.8.0. The pooled  
14 results averaged over 25 iterations are depicted in Supplementary Table 2. A complete cases  
15 analysis showed similar results (data not shown).  
16  
17  
18  
19  
20  
21  
22  
23  
24  
25  
26  
27  
28  
29  
30  
31  
32  
33  
34  
35  
36  
37  
38  
39  
40  
41  
42  
43  
44  
45  
46  
47  
48  
49  
50  
51  
52  
53  
54  
55  
56  
57  
58  
59  
60

**Supplementary table S1:** Effect of the cumulative risk factors, antihypertensive medication, lipid-lowering medication and antidiabetic medication on mortality after correction for covariates.

| Covariate                                | Mortality |       |      |         |
|------------------------------------------|-----------|-------|------|---------|
|                                          | HR        | 95%CI |      | P-value |
| <b>1 RF</b>                              | 1.01      | 0.73  | 1.39 | 0.956   |
| <b>≥2 RF</b>                             | 1.38      | 1.02  | 1.86 | 0.034   |
| <b>Women</b>                             | 0.94      | 0.74  | 1.19 | 0.612   |
| <b>Age</b>                               | 1.07      | 1.06  | 1.08 | <0.001  |
| <b>Beta-blockers and antiplatelet-Rx</b> | 1.27      | 0.93  | 1.73 | 0.130   |
| <b>Obesity</b>                           | 1.26      | 0.97  | 1.65 | 0.086   |
| <b>Current smoker</b>                    | 0.83      | 0.46  | 1.50 | 0.533   |

| Covariate                                | Mortality |       |      |         | Covariate                                | Mortality |       |      |         | Covariate                                | Mortality |       |      |         |
|------------------------------------------|-----------|-------|------|---------|------------------------------------------|-----------|-------|------|---------|------------------------------------------|-----------|-------|------|---------|
|                                          | HR        | 95%CI |      | P-value |                                          | HR        | 95%CI |      | P-value |                                          | HR        | 95%CI |      | P-value |
| <b>1 BP-lowering-Rx</b>                  | 1.04      | 0.78  | 1.38 | 0.790   | <b>1 lipid-lowering-Rx</b>               | 1.14      | 0.89  | 1.45 | 0.292   | <b>1 antidiabetic-Rx</b>                 | 1.25      | 0.90  | 1.74 | 0.182   |
| <b>≥2 BP-lowering-Rx</b>                 | 1.33      | 1.01  | 1.76 | 0.043   |                                          |           |       |      |         | <b>≥2 antidiabetic-Rx</b>                | 1.93      | 1.43  | 2.62 | <0.001  |
| <b>Women</b>                             | 0.90      | 0.72  | 1.14 | 0.391   | <b>Women</b>                             | 0.92      | 0.73  | 1.17 | 0.502   | <b>Women</b>                             | 0.93      | 0.74  | 1.17 | 0.538   |
| <b>Age</b>                               | 1.07      | 1.06  | 1.08 | <0.001  | <b>Age</b>                               | 1.07      | 1.06  | 1.08 | <0.001  | <b>Age</b>                               | 1.07      | 1.06  | 1.08 | <0.001  |
| <b>Beta-blockers and antiplatelet-Rx</b> | 1.34      | 0.99  | 1.82 | 0.056   | <b>Beta-blockers and antiplatelet-Rx</b> | 1.36      | 1.00  | 1.86 | 0.051   | <b>Beta-blockers and antiplatelet-Rx</b> | 1.34      | 0.99  | 1.80 | 0.057   |
| <b>Obesity</b>                           | 1.27      | 0.97  | 1.66 | 0.078   | <b>Obesity</b>                           | 1.30      | 1.00  | 1.69 | 0.051   | <b>Obesity</b>                           | 1.18      | 0.90  | 1.55 | 0.226   |
| <b>Current smoker</b>                    | 0.87      | 0.50  | 1.51 | 0.615   | <b>Current smoker</b>                    | 0.87      | 0.50  | 1.52 | 0.624   | <b>Current smoker</b>                    | 0.91      | 0.52  | 1.58 | 0.725   |

1  
2  
3 **Supplement 3: Baseline characteristics in subset with detailed clinical history**  
4

5 In three of the participating hospitals (Amsterdam UMC location AMC, Amsterdam UMC  
6 location VUMC, Flevoziekenhuis), we collected additional clinical information to validate the  
7 medication use as surrogate marker for cardiovascular risk factors and disease.  
8  
9  
10  
11  
12  
13  
14  
15  
16  
17  
18  
19  
20  
21  
22  
23  
24  
25  
26  
27  
28  
29  
30  
31  
32  
33  
34  
35  
36  
37  
38  
39  
40  
41  
42  
43  
44  
45  
46  
47  
48  
49  
50  
51  
52  
53  
54  
55  
56  
57  
58  
59  
60

For peer review only

**Supplementary table S2:** Baseline characteristics of complete cohort, and subgroup where additional information about prior cardiovascular events was available.

| n                                                    | Overall<br>1604 | Subset<br>566 |
|------------------------------------------------------|-----------------|---------------|
| Age (mean (SD))                                      | 65.67 (15.06)   | 61.37 (14.60) |
| Women                                                | 633 (39.5)      | 241 (42.6)    |
| Chronic cardiac disease                              | 467 (29.2)      | 125 (22.1)    |
| Hypertension                                         | 734 (46.0)      | 252 (44.8)    |
| Chronic pulmonary disease                            | 288 (18.0)      | 77 (13.6)     |
| Asthma                                               | 179 (11.2)      | 56 (9.9)      |
| Chronic kidney disease                               | 150 (9.4)       | 57 (10.1)     |
| Diabetes                                             | 411 (25.7)      | 154 (27.2)    |
| Malignant neoplasm                                   | 98 (6.2)        | 31 (5.5)      |
| Chronic hematologic disorder                         | 57 (3.6)        | 23 (4.1)      |
| Smoking                                              | 78 (6.5)        | 28 (6.2)      |
| Obesity                                              | 464 (30.8)      | 168 (32.8)    |
| Combined use of beta-blockers and antiplatelet drugs | 167 (10.4)      | 50 (8.8)      |
| History of coronary artery disease                   |                 | 74 (13.1)     |
| History of heart failure                             |                 | 21 (3.7)      |
| History of stroke                                    |                 | 42 (7.4)      |
| History of peripheral artery disease                 |                 | 9 (1.6)       |
| Antihypertensive-Rx                                  |                 |               |
| 0                                                    | 883 (55.0)      | 327 (57.8)    |
| 1                                                    | 377 (23.5)      | 126 (22.3)    |
| 2                                                    | 282 (17.6)      | 81 (14.3)     |
| ≥ 3                                                  | 62 (3.9)        | 32 (5.7)      |
| Lipid-lowering-Rx                                    |                 |               |
| 0                                                    | 1047 (65.3)     | 399 (70.5)    |
| ≥ 1                                                  | 557 (34.7)      | 167 (29.5)    |
| Glucose-lowering-Rx                                  |                 |               |
| 0                                                    | 1250 (77.9)     | 435 (76.9)    |
| 1                                                    | 170 (10.6)      | 60 (10.6)     |
| ≥ 2                                                  | 184 (11.5)      | 71 (12.5)     |

RF, risk factor; SD, standard deviation; IQR, interquartile range, Rx medication.

Cox-regression for the effect of the number of antihypertensive, lipid-lowering and antidiabetic drug classes on mortality. Table depicts results from multivariate analysis

1  
2  
3 including age, sex, obesity, current smoker and the use of beta-blockers and antiplatelet  
4  
5 medication. Rx, medication; HR, hazard ratio; CI, confidence interval.  
6  
7  
8  
9  
10  
11  
12  
13  
14  
15  
16  
17  
18  
19  
20  
21  
22  
23  
24  
25  
26  
27  
28  
29  
30  
31  
32  
33  
34  
35  
36  
37  
38  
39  
40  
41  
42  
43  
44  
45  
46  
47  
48  
49  
50  
51  
52  
53  
54  
55  
56  
57  
58  
59  
60

For peer review only

**STROBE 2007 (v4) Statement—Checklist of items that should be included in reports of *cohort studies***

| Section/Topic                | Item # | Recommendation                                                                                                                                                                       | Reported on page # |
|------------------------------|--------|--------------------------------------------------------------------------------------------------------------------------------------------------------------------------------------|--------------------|
| <b>Title and abstract</b>    | 1      | (a) Indicate the study's design with a commonly used term in the title or the abstract                                                                                               | 1                  |
|                              |        | (b) Provide in the abstract an informative and balanced summary of what was done and what was found                                                                                  | 2                  |
| <b>Introduction</b>          |        |                                                                                                                                                                                      |                    |
| Background/rationale         | 2      | Explain the scientific background and rationale for the investigation being reported                                                                                                 | 4                  |
| Objectives                   | 3      | State specific objectives, including any prespecified hypotheses                                                                                                                     | 4                  |
| <b>Methods</b>               |        |                                                                                                                                                                                      |                    |
| Study design                 | 4      | Present key elements of study design early in the paper                                                                                                                              | 5                  |
| Setting                      | 5      | Describe the setting, locations, and relevant dates, including periods of recruitment, exposure, follow-up, and data collection                                                      | 5                  |
| Participants                 | 6      | (a) Give the eligibility criteria, and the sources and methods of selection of participants. Describe methods of follow-up                                                           | 5                  |
|                              |        | (b) For matched studies, give matching criteria and number of exposed and unexposed                                                                                                  |                    |
| Variables                    | 7      | Clearly define all outcomes, exposures, predictors, potential confounders, and effect modifiers. Give diagnostic criteria, if applicable                                             | 6                  |
| Data sources/<br>measurement | 8*     | For each variable of interest, give sources of data and details of methods of assessment (measurement). Describe comparability of assessment methods if there is more than one group | 5                  |
| Bias                         | 9      | Describe any efforts to address potential sources of bias                                                                                                                            | 6                  |
| Study size                   | 10     | Explain how the study size was arrived at                                                                                                                                            | 6                  |
| Quantitative variables       | 11     | Explain how quantitative variables were handled in the analyses. If applicable, describe which groupings were chosen and why                                                         | 6                  |
| Statistical methods          | 12     | (a) Describe all statistical methods, including those used to control for confounding                                                                                                | 6                  |
|                              |        | (b) Describe any methods used to examine subgroups and interactions                                                                                                                  | 6                  |
|                              |        | (c) Explain how missing data were addressed                                                                                                                                          | 6; 23              |
|                              |        | (d) If applicable, explain how loss to follow-up was addressed                                                                                                                       | 6                  |
|                              |        | (e) Describe any sensitivity analyses                                                                                                                                                | 6                  |
| <b>Results</b>               |        |                                                                                                                                                                                      |                    |



|                          |     |                                                                                                                                                                                                              |              |
|--------------------------|-----|--------------------------------------------------------------------------------------------------------------------------------------------------------------------------------------------------------------|--------------|
| Participants             | 13* | (a) Report numbers of individuals at each stage of study—eg numbers potentially eligible, examined for eligibility, confirmed eligible, included in the study, completing follow-up, and analysed            | 7            |
|                          |     | (b) Give reasons for non-participation at each stage                                                                                                                                                         | 7            |
|                          |     | (c) Consider use of a flow diagram                                                                                                                                                                           | 7            |
| Descriptive data         | 14* | (a) Give characteristics of study participants (eg demographic, clinical, social) and information on exposures and potential confounders                                                                     | 7, 19, 27    |
|                          |     | (b) Indicate number of participants with missing data for each variable of interest                                                                                                                          | 23           |
|                          |     | (c) Summarise follow-up time (eg, average and total amount)                                                                                                                                                  | 6, 18, 22    |
| Outcome data             | 15* | Report numbers of outcome events or summary measures over time                                                                                                                                               | 8            |
| Main results             | 16  | (a) Give unadjusted estimates and, if applicable, confounder-adjusted estimates and their precision (eg, 95% confidence interval). Make clear which confounders were adjusted for and why they were included | 8,20, 21, 24 |
|                          |     | (b) Report category boundaries when continuous variables were categorized                                                                                                                                    |              |
|                          |     | (c) If relevant, consider translating estimates of relative risk into absolute risk for a meaningful time period                                                                                             |              |
| Other analyses           | 17  | Report other analyses done—eg analyses of subgroups and interactions, and sensitivity analyses                                                                                                               | 8, 22        |
| <b>Discussion</b>        |     |                                                                                                                                                                                                              |              |
| Key results              | 18  | Summarise key results with reference to study objectives                                                                                                                                                     | 9            |
| <b>Limitations</b>       |     |                                                                                                                                                                                                              |              |
| Interpretation           | 20  | Give a cautious overall interpretation of results considering objectives, limitations, multiplicity of analyses, results from similar studies, and other relevant evidence                                   | 9,10,11,12   |
| Generalisability         | 21  | Discuss the generalisability (external validity) of the study results                                                                                                                                        | 9,10,11,12   |
| <b>Other information</b> |     |                                                                                                                                                                                                              |              |
| Funding                  | 22  | Give the source of funding and the role of the funders for the present study and, if applicable, for the original study on which the present article is based                                                | 13           |

\*Give information separately for cases and controls in case-control studies and, if applicable, for exposed and unexposed groups in cohort and cross-sectional studies.

**Note:** An Explanation and Elaboration article discusses each checklist item and gives methodological background and published examples of transparent reporting. The STROBE checklist is best used in conjunction with this article (freely available on the Web sites of PLoS Medicine at <http://www.plosmedicine.org/>, Annals of Internal Medicine at <http://www.annals.org/>, and Epidemiology at <http://www.epidem.com/>). Information on the STROBE Initiative is available at [www.strobe-statement.org](http://www.strobe-statement.org).

# BMJ Open

## Cardiovascular risk factors and COVID-19 outcomes in hospitalized patients: a prospective cohort study

|                                 |                                                                                                                                                                                                                                                                                                                                                                                                                                                                                                                                                                                                                                                                                                                                                                                                                                                                                                                                                                                                                                                                               |
|---------------------------------|-------------------------------------------------------------------------------------------------------------------------------------------------------------------------------------------------------------------------------------------------------------------------------------------------------------------------------------------------------------------------------------------------------------------------------------------------------------------------------------------------------------------------------------------------------------------------------------------------------------------------------------------------------------------------------------------------------------------------------------------------------------------------------------------------------------------------------------------------------------------------------------------------------------------------------------------------------------------------------------------------------------------------------------------------------------------------------|
| Journal:                        | <i>BMJ Open</i>                                                                                                                                                                                                                                                                                                                                                                                                                                                                                                                                                                                                                                                                                                                                                                                                                                                                                                                                                                                                                                                               |
| Manuscript ID                   | bmjopen-2020-045482.R1                                                                                                                                                                                                                                                                                                                                                                                                                                                                                                                                                                                                                                                                                                                                                                                                                                                                                                                                                                                                                                                        |
| Article Type:                   | Original research                                                                                                                                                                                                                                                                                                                                                                                                                                                                                                                                                                                                                                                                                                                                                                                                                                                                                                                                                                                                                                                             |
| Date Submitted by the Author:   | 24-Nov-2020                                                                                                                                                                                                                                                                                                                                                                                                                                                                                                                                                                                                                                                                                                                                                                                                                                                                                                                                                                                                                                                                   |
| Complete List of Authors:       | Collard, Didier; Amsterdam UMC Location AMC, Vascular Medicine<br>Nurmohamed, Nick; Amsterdam UMC Location AMC, Vascular Medicine;<br>Amsterdam UMC Locatie VUmc, Cardiology<br>Kaiser, Yannick; Amsterdam UMC Location AMC, Vascular Medicine<br>Reeskamp, Laurens; Amsterdam University Medical Centers, Vascular Medicine<br>Dormans, Tom; Zuyderland Medical Centre Sittard-Geleen, Department of Intensive Care<br>Moeniralam, Hazra; Sint Antonius Hospital, Internal Medicine<br>Simsek, Suat; Noordwest Ziekenhuisgroep, Department of Internal Medicine<br>Douma, Renee; Flevoziekenhuis, Internal Medicine<br>Eerens, Annet ; Treant Healthcare Group, Oncology<br>Reidinga, Auke; Martini Ziekenhuis, Intensive Care<br>Elbers, Paul; Amsterdam UMC - Locatie VUMC, Department of Intensive Care<br>Beudel, Martijn; Amsterdam UMC Location AMC, Neurology<br>Vogt, Liffert; Amsterdam UMC Location AMC, Internal Medicine<br>Stroes, Erik; Amsterdam UMC Location AMC, Vascular Medicine<br>van den Born, Bert-Jan; Amsterdam UMC Location AMC, Vascular Medicine |
| <b>Primary Subject Heading</b>: | Infectious diseases                                                                                                                                                                                                                                                                                                                                                                                                                                                                                                                                                                                                                                                                                                                                                                                                                                                                                                                                                                                                                                                           |
| Secondary Subject Heading:      | Intensive care, Cardiovascular medicine, Epidemiology                                                                                                                                                                                                                                                                                                                                                                                                                                                                                                                                                                                                                                                                                                                                                                                                                                                                                                                                                                                                                         |
| Keywords:                       | COVID-19, Hypertension < CARDIOLOGY, General diabetes < DIABETES & ENDOCRINOLOGY, INTENSIVE & CRITICAL CARE, Ischaemic heart disease < CARDIOLOGY, Vascular medicine < INTERNAL MEDICINE                                                                                                                                                                                                                                                                                                                                                                                                                                                                                                                                                                                                                                                                                                                                                                                                                                                                                      |
|                                 |                                                                                                                                                                                                                                                                                                                                                                                                                                                                                                                                                                                                                                                                                                                                                                                                                                                                                                                                                                                                                                                                               |

SCHOLARONE™  
Manuscripts



I, the Submitting Author has the right to grant and does grant on behalf of all authors of the Work (as defined in the below author licence), an exclusive licence and/or a non-exclusive licence for contributions from authors who are: i) UK Crown employees; ii) where BMJ has agreed a CC-BY licence shall apply, and/or iii) in accordance with the terms applicable for US Federal Government officers or employees acting as part of their official duties; on a worldwide, perpetual, irrevocable, royalty-free basis to BMJ Publishing Group Ltd ("BMJ") its licensees and where the relevant Journal is co-owned by BMJ to the co-owners of the Journal, to publish the Work in this journal and any other BMJ products and to exploit all rights, as set out in our [licence](#).

The Submitting Author accepts and understands that any supply made under these terms is made by BMJ to the Submitting Author unless you are acting as an employee on behalf of your employer or a postgraduate student of an affiliated institution which is paying any applicable article publishing charge ("APC") for Open Access articles. Where the Submitting Author wishes to make the Work available on an Open Access basis (and intends to pay the relevant APC), the terms of reuse of such Open Access shall be governed by a Creative Commons licence – details of these licences and which [Creative Commons](#) licence will apply to this Work are set out in our licence referred to above.

Other than as permitted in any relevant BMJ Author's Self Archiving Policies, I confirm this Work has not been accepted for publication elsewhere, is not being considered for publication elsewhere and does not duplicate material already published. I confirm all authors consent to publication of this Work and authorise the granting of this licence.

1  
2  
3 **Cardiovascular risk factors and COVID-19 outcomes in hospitalized patients: a**  
4  
5 **prospective cohort study**  
6  
7

8 **Authors:** Didier Collard MD<sup>1\*</sup>, Nick S. Nurmohamed MD<sup>1,2\*</sup>, Yannick Kaiser MD<sup>1\*</sup>, Laurens  
9 F. Reeskamp MD<sup>1</sup>, Tom Dormans MD PhD<sup>3</sup>, Hazra Moeniralam MD PhD<sup>4</sup>, Suat Simsek MD  
10 PhD<sup>5</sup>, Renée A. Douma MD PhD<sup>6</sup>, Annet Eerens<sup>7</sup>, Auke C. Reidinga MD<sup>8</sup>, Paul Elbers MD  
11 PhD<sup>9</sup>, Martijn Beudel MD PhD<sup>10</sup>, Liffert Vogt MD PhD<sup>11</sup>, Erik S.G. Stroes MD PhD<sup>1</sup>, Bert-  
12 Jan H. van den Born MD PhD<sup>1,12</sup>  
13  
14

15 \*These authors contributed equally to this work  
16  
17

18 **Affiliations**

19 <sup>1</sup> Amsterdam UMC, University of Amsterdam, Department of Vascular Medicine, Amsterdam  
20 Cardiovascular Sciences, Amsterdam, the Netherlands

21 <sup>2</sup> Amsterdam UMC, Vrije Universiteit Amsterdam, Department of Cardiology, Amsterdam  
22 Cardiovascular Sciences, Amsterdam, the Netherlands

23 <sup>3</sup> Zuyderland Medisch Centrum, Department of Intensive Care, Sittard-Geleen, the  
24 Netherlands

25 <sup>4</sup> St. Antonius Hospital, Department of Internal Medicine, Nieuwegein, the Netherlands

26 <sup>5</sup> Northwest Clinics, Department of Internal Medicine, Alkmaar, The Netherlands

27 <sup>6</sup> Flevohospital, Department of Internal Medicine, Almere, The Netherlands

28 <sup>7</sup> Treant Healthcare Group, Department of Oncology, Hoogeveen, The Netherlands

29 <sup>8</sup> Martini Hospital, Intensive Care Unit, Groningen, The Netherlands

30 <sup>9</sup> Amsterdam UMC, Vrije Universiteit Amsterdam, Department of Intensive Care, Amsterdam  
31 Amsterdam, the Netherlands

32 <sup>10</sup> Amsterdam UMC, University of Amsterdam, Department of Neurology, Amsterdam  
33 Neuroscience Institute, Amsterdam, the Netherlands

34 <sup>11</sup> Amsterdam UMC, University of Amsterdam, Department of Nephrology, Amsterdam  
35 Cardiovascular Sciences, Amsterdam, the Netherlands

36 <sup>12</sup> Amsterdam UMC, University of Amsterdam, Department of Public Health, Amsterdam, the  
37 Netherlands  
38  
39

40 **Keywords:** COVID-19, SARS-CoV-2, CVD, hypertension, diabetes, mortality, ICU-  
41 admission  
42

43 **Word count:** 3724 (manuscript, including references), 300 (abstract)

44 **Figures:** tables: 3, figures: 1, supplements: 2  
45

46 **Address for correspondence**

47 Dr. Bert-Jan H. van den Born

48 Department of Vascular Medicine, Amsterdam University Medical Centers, University of  
49 Amsterdam  
50

51 Meibergdreef 9, 1105 AZ Amsterdam, the Netherlands

52 Email: [b.j.vandenborn@amsterdamumc.nl](mailto:b.j.vandenborn@amsterdamumc.nl), tel: +3120-5666612  
53  
54

## Abstract

**Objectives:** Recent reports suggest a high prevalence of hypertension and diabetes in COVID-19 patients, but the role of cardiovascular disease (CVD) risk factors in the clinical course of COVID-19 is unknown. We evaluated the time-to-event relationship between hypertension, dyslipidemia, diabetes, and COVID-19 outcomes.

**Design:** We analyzed data from the prospective Dutch COVID-PREDICT cohort, an ongoing prospective study of patients admitted for COVID-19 infection.

**Setting:** Patients from 8 participating hospitals, including two university hospitals from the COVID-PREDICT cohort were included.

**Participants:** Admitted, adult patients with a positive COVID-19 polymerase chain reaction (PCR) or high suspicion based on CT-imaging of the thorax. Patients were followed for major outcomes during hospitalization. CVD risk factors were established via home medication lists and divided in antihypertensives, lipid lowering therapy, and antidiabetics.

**Primary and secondary outcomes measures:** The primary outcome was mortality during the first 21 days following admission, secondary outcomes consisted of ICU-admission and ICU-mortality. Kaplan-Meier and Cox-regression analyses were used to determine the association with CVD risk factors.

**Results:** We included 1604 patients with a mean age of  $66 \pm 15$  of whom 60.5% were men. Antihypertensives, lipid lowering therapy, and antidiabetics were used by 45%, 34.7%, and 22.1% of patients. After 21-days of follow-up; 19.2% of the patients had died or were discharged for palliative care. Cox-regression analysis after adjustment for age and sex showed that the presence of  $\geq 2$  risk factors was associated with increased mortality risk (HR 1.52, 95%CI 1.15-2.02), but not with ICU-admission. Moreover, the use of  $\geq 2$  antidiabetics and  $\geq 2$  antihypertensives was associated with mortality independent of age and sex with HRs of respectively 2.09 (95%CI 1.55-2.80) and 1.46 (95%CI 1.11-1.91).

1  
2  
3 **Conclusions:** The accumulation of hypertension, dyslipidemia and diabetes leads to a  
4  
5 stepwise increased risk for short-term mortality in hospitalized COVID-19 patients  
6  
7 independent of age and sex. Further studies investigating how these risk factors  
8  
9 disproportionately affect COVID-19 patients are warranted.  
10  
11  
12  
13

#### 14 **Strengths and limitations of this study**

- 15  
16  
17 • While previous data reported a high prevalence of CVD risk factors in COVID-19  
18  
19 patients, this study investigated whether diabetes, dyslipidemia and hypertension predict  
20  
21 adverse outcomes.  
22  
23
- 24 • This study is limited by the use of medication as surrogate for cardiovascular risk factors  
25
- 26 • The causality of the investigated risk factors remains to be addressed in future studies.  
27  
28  
29  
30  
31  
32  
33  
34  
35  
36  
37  
38  
39  
40  
41  
42  
43  
44  
45  
46  
47  
48  
49  
50  
51  
52  
53  
54  
55  
56  
57  
58  
59  
60

## Introduction

The global spread of coronavirus disease 2019 (COVID-19), first identified in Wuhan, China, in December 2019, has ignited an unprecedented ongoing global pandemic.(1) Although most infected individuals experience only mild symptoms that do not require hospitalization, the absolute number of patients requiring hospital admission is staggering. Risk stratification of these patients is crucial to optimize the use of hospital resources.(2) Several associations with adverse outcomes in COVID-19 patients have been identified, including factors that also predispose to cardiovascular disease (CVD), such as older age, male sex, hypertension, overweight and diabetes.(3,4) Furthermore, individuals with overt CVD appear to be affected more seriously by COVID-19 infection.(5)

The association between cardiovascular events and infectious diseases is well established. Examples include the increased prevalence of myocardial infarction during influenza pandemics,(6) and the higher number of cardiac complications in patients hospitalized for community-acquired pneumonia.(7) However, there are conflicting data whether the presence of shared CVD and COVID-19 risk factors merely reflect advanced age and history of ischemic heart disease in patients who develop severe infection, or are independently associated with adverse outcomes in the COVID-19 patient population.(4,8) For example, a higher than expected prevalence of diabetes, hypertension, obesity, and history of CVD was reported during the previous outbreak of the Middle East respiratory syndrome coronavirus (MERS-CoV), which shares many similarities with COVID-19.(9)

In the present study, we hypothesized that three major risk independent CVD risk factors are associated with adverse outcomes in COVID-19 patients. To this end, we evaluated the time-to-event relationship between COVID-19 disease outcomes and a history of medication use for hypertension, dyslipidemia, and diabetes mellitus in a large prospective Dutch cohort of hospitalized COVID-19 patients.

## Patients and Methods

### *Study design*

CovidPredict is a Dutch multicenter initiative to collect data of hospitalized patients with confirmed COVID-19.<sup>(10)</sup> For this study, patients from 8 participating hospitals, including two university hospitals were included. All hospitalized patients >18 years with a positive COVID-19 polymerase chain reaction (PCR) or high suspicion based on CT-imaging of the thorax were included (CO-RADS score 4 or 5).<sup>(11,12)</sup> A waiver for the use hospital record data was obtained from the Medical Ethical Committees of the participating centers. Patients were given the opportunity to opt out.

The collected data was updated with daily reports on vital signs, laboratory results, complications, and clinical outcomes. In addition, the use of antihypertensive, lipid-lowering, and/or antidiabetic medication was determined from the home medication list. These were used as surrogates for hypertension, dyslipidemia, and diabetes. Antihypertensive medication was categorized as using either 0, 1, more than 1 of the following categories: non-dihydropyridine calcium channel blockers (CCBs), renin angiotensin system (RAS)-inhibitors (either angiotensin receptor antagonist or angiotensin receptor blockers) and diuretics (either loop diuretics, thiazide or thiazide like diuretics or potassium channel blockers). Lipid-lowering therapy was classified as the use of statin, ezetimibe, fibrates, or PCSK9-inhibitors. Antidiabetic medication was classified as using either 0, 1 or more than 1 of the following classes: metformin, sulfonylurea derivatives, GLP-1 agonists, DDP4- inhibitors, SGLT-2 inhibitors, and insulin. Obesity was defined as a BMI >30 kg/m. Smoking was categorized into current or non/former smoker. The combined use of beta-blockers and platelet aggregation inhibitors was used as a surrogate for history of ischemic cardiac disease.



1  
2  
3 Outcomes were determined 3 and 6 weeks after admission, or earlier when the patient died or  
4 was discharged from the hospital.  
5  
6  
7  
8  
9

### 10 *Primary and secondary outcomes*

11  
12 The primary outcome consisted of overall mortality during the first 21 days following  
13 admission. Overall mortality was defined as either mortality during admission or discharge for  
14 palliative care, either at home or a palliative care facility. If the patient was discharged alive  
15 from the hospital and no further follow-up data was available, we considered the patient to be  
16 event free for the whole study period. Secondary outcomes consisted of ICU-admission and  
17 mortality in the subset of patients who had been admitted to the ICU.  
18  
19  
20  
21  
22  
23  
24  
25  
26  
27

### 28 *Statistical analysis*

29  
30 For the analysis, we included all consecutive patients who were primarily admitted to one of  
31 the participating centers between February 27<sup>th</sup> and July 4<sup>th</sup> 2020. Patients with unknown  
32 medication use prior to hospitalization were excluded. Patients were categorized based on the  
33 presence of either 0, 1 or more than 1 medication based cardiovascular risk factor  
34 (hypertension, dyslipidemia, diabetes). Baseline characteristics were depicted as mean  $\pm$   
35 standard deviation for normally distributed data, nonnormally as median [interquartile range],  
36 or as number (percentage) for categorical variables, and were compared using the appropriate  
37 tests (ANOVA, Kruskal-Wallis, chi-squared). The relationship between outcomes and  
38 cumulative cardiovascular risk factors was determined using a Kaplan-Meier analysis. We  
39 then determined hazard ratios using Cox-regression after adjustment for age and sex, and with  
40 additional adjustment for obesity, smoking and history of ischemic cardiac disease. For ICU-  
41 mortality, a landmark analysis was performed starting from ICU-admission. Next, with Cox-  
42 regression models using the same covariates we determined the association between mortality  
43  
44  
45  
46  
47  
48  
49  
50  
51  
52  
53  
54  
55  
56  
57  
58  
59  
60

1  
2  
3 and the use of antihypertensive, lipid-lowering, and antidiabetic drugs. The proportional  
4 hazard assumptions were verified using Schoenfeld residuals. All statistical analyses were  
5 conducted with R version 3.6.3 (R Foundation, Vienna, Austria) using the Survival version  
6 3.1-11 and Tableone version 0.11.1 packages.  
7  
8  
9

### 10 11 12 13 14 15 *Patient and public involvement*

16 This study was performed during the first wave of the COVID-19 pandemic in the  
17 Netherlands. Therefore, it was not possible to involve patients or the public in the design, or  
18 conduct, or reporting, or dissemination plans of our research. All CovidPredict study results  
19 will be communicated via [www.covidpredict.org](http://www.covidpredict.org).  
20  
21  
22  
23  
24  
25  
26  
27

## 28 **Results**

### 29 30 31 *Patient characteristics*

32 Between February 27<sup>th</sup> 2020 and July 4<sup>th</sup> 2020, a total of 1614 patients with a confirmed  
33 COVID-19 infection were primarily admitted to one of the participating centers in the  
34 Netherlands. After exclusion of patients with an unknown medication list, we included 1604  
35 patients in the present analysis (Table 1). Their mean age was 66±15 years, 67.6% were  
36 Caucasian, and 60.5% were men. 6.5% of the admitted patients were current smokers. 1526  
37 patients (95.7%) had a positive PCR for COVID-19 during hospitalization. The majority of  
38 admitted patients (924, 57.6%) used some form of cardiovascular medication prior to  
39 admission. Antihypertensive medication was used by 721 (45.0%) patients, of whom 497  
40 (68.9%) used RAS-inhibitors, 256 (35.5%) calcium-antagonists, and 374 (51.9%) diuretics.  
41 Lipid-lowering therapy was used by 557 (34.7%) patients, predominantly consisting of statins  
42 (540, 96.9%). In total, 354 (22.1%) patients used antidiabetic medication, of whom 282  
43 (79.7%) used metformin and 137 patients (38.7%) insulin. 167 patients (10.4%) used the  
44  
45  
46  
47  
48  
49  
50  
51  
52  
53  
54  
55  
56  
57  
58  
59  
60

1  
2  
3 combination of a beta-blocker and a platelet aggregation inhibitor, reflecting a history of  
4  
5 ischemic cardiac disease. In the subset of 566 patients for whom a more detailed medical  
6  
7 history was available, we found a similar prevalence of cardiovascular disease, with 13.1% of  
8  
9 the patients having a history of coronary artery disease, 3.7% of heart failure, 7.4% of stroke  
10  
11 and 1.6% of peripheral arterial disease (see Supplement 1).  
12  
13  
14  
15  
16  
17  
18  
19  
20  
21  
22  
23  
24  
25  
26  
27  
28  
29  
30  
31  
32  
33  
34  
35  
36  
37  
38  
39  
40  
41  
42  
43  
44  
45  
46  
47  
48  
49  
50  
51  
52  
53  
54  
55  
56  
57  
58  
59  
60

For peer review only

### *Cardiovascular risk factors as markers for mortality and ICU-admission*

In the entire cohort, 308 (19.2%) of the patients died or were discharged for palliative care. In total 273 (17.0%) of the patients were admitted to the ICU, of whom 78 died. 1100 (68.6%) patients were discharged alive from the hospital, 50 (3.1%) were transferred to another hospital. The remaining patients were still admitted to the hospital at time of the data collection (126; 7.9%) or follow-up data was not available yet (20; 1.25%). The Kaplan-Meier analysis showed a significant association between cardiovascular risk factors and overall mortality ( $p < 0.0001$ ; Figure 1A), with a 21-day mortality of respectively 11.9%, 20.5% and 29.1% for patients with 0, 1, and  $\geq 2$  CVD-risk factors. We found no association between cardiovascular risk factors and ICU-admission ( $p = 0.85$ ; Figure 1B), with an unadjusted admission rate of respectively 17.3%, 16.6% and 18.2%. In patients admitted to the ICU, we found a trend towards increased mortality, with an ICU-mortality of 27.2%, 29.1%, 40.1% for patients with 0, 1, and  $\geq 2$  CVD-risk factors ( $p = 0.055$ ; Figure 1C). In Cox-regression analysis, a 5-year age increase was associated with a HR of 1.37 (CI 1.31-1.45) for mortality, while there was no significant association with sex (HR 1.02, CI 0.81-1.28). The presence of two or more cardiovascular risk factors was significantly associated with overall mortality (HR 1.52, 95%CI 1.15-2.02), but not with ICU-admission or ICU-mortality (Table 2). After additional adjustment for smoking, obesity, and the combined use of beta-blockers and platelet aggregation inhibitors the presence of two or more risk factors remained associated with mortality (HR 1.38, 95%CI 1.02-1.86), while there was no increased risk in the group with 1 CVD-risk factor (HR 1.01, 95%CI 0.73-1.39).

### *Individual risk factors*

In the Cox-regression models adjusted for age and sex, we observed that the use of two or more different classes of antihypertensives and antidiabetics were associated with 21-day

1  
2  
3 mortality, with HR of respectively of 1.46 (95%CI 1.11-1.91) and 2.09 (95%CI 1.55-2.80).  
4  
5 Similarly, we found a HR of 1.25 (95%CI 0.99-1.56) for the use of lipid-lowering medication.  
6  
7 Additional adjustment for smoking, obesity and the combined use of beta-blockers and  
8  
9 antiplatelet medication attenuated the association between the use of BP-lowering and lipid-  
10  
11 lowering medication towards 1.33 (95%CI 1.01-1.76) and 1.14 (95%CI 0.89-1.45) for the use  
12  
13 of  $\geq 2$  BP-lowering drugs or  $\geq 1$  lipid-lowering drug respectively. The association between the  
14  
15 use of 2 or more glucose-lowering medications and mortality remained significant with an  
16  
17 adjusted HR of 1.93 (95%CI 1.43-2.62; Table 3). The hazard ratios for the other covariates  
18  
19 included in the regression analysis can be found in Supplement 2.  
20  
21  
22  
23  
24  
25

## 26 Discussion

27  
28 In a large Dutch cohort of hospitalized COVID-19 patients, we observed that patients with  
29  
30 more than one risk factor for CVD had a 52% higher 3-week mortality risk, independent of  
31  
32 age and sex. In addition, our data show that the use of two or more antihypertensives or  
33  
34 antidiabetics, or one lipid-lowering drug is associated with adverse outcomes in COVID-19  
35  
36 patients. Patients using two or more antidiabetic drugs had the highest mortality risk. This  
37  
38 suggests that patients with a history of or at high risk for cardiovascular disease have an  
39  
40 increased risk for adverse COVID-19 disease outcomes.  
41  
42  
43  
44  
45  
46

47 The prevalence of medication use for CVD risk factors was higher in COVID-19 patients than  
48  
49 in previously described cohorts representative for the general Dutch population of similar  
50  
51 age.<sup>(13)</sup> Wuhan-based COVID-19 cohorts were the first to describe a higher mortality in  
52  
53 those with hypertension and diabetes.<sup>(14)</sup> However, the average age and reported prevalence  
54  
55 of CVD risk factors was much lower in these cohorts than in the present study.<sup>(4)</sup> The  
56  
57 increased case-fatality rate in Europe and the US compared with China may in part be  
58  
59  
60

1  
2  
3 attributable to demographic differences in the COVID-19 infected population.(15) Recent  
4  
5 European and US-based cohorts indeed demonstrate a higher average age with a similar  
6  
7 distribution of hypertension and diabetes compared to our study, and also show a higher  
8  
9 mortality in COVID-19 patients with hypertension and diabetes.(16,17) In line with the  
10  
11 results from a large US-based cohort, we observed that age was significantly associated with  
12  
13 mortality, while we found no significant difference in mortality between sexes.(18) This  
14  
15 suggests that although men are more often hospitalized, there is no substantial difference in  
16  
17 mortality after admission for severe COVID-19 infection. We add to these findings that the  
18  
19 accumulation of CVD risk factors is associated with mortality, independent of age, sex,  
20  
21 presence of coronary artery disease, smoking and obesity in hospitalized patients.  
22  
23  
24  
25  
26  
27

28 Analogous to COVID-19, CVD risk factors are also prevalent among patients hospitalized for  
29  
30 community-acquired pneumonia.(19) However, we observed a stronger association between  
31  
32 hypertension, diabetes, dyslipidemia and mortality in COVID-19 patients compared with  
33  
34 previous studies on community-acquired pneumonia, despite a similar prevalence of CVD  
35  
36 risk factors.(20) In addition, these effects remained significant after adjustment for covariates  
37  
38 such as smoking, obesity, and the use of beta-blockers and antiplatelet drugs as surrogate for a  
39  
40 history of ischemic cardiac disease. This might suggest that CVD risk factors in COVID-19  
41  
42 patients disproportionately affect the clinical course of COVID-19 patients compared to other  
43  
44 infectious diseases. The present findings are comparable to the previous MERS-CoV  
45  
46 outbreak, which also saw a preponderance of hypertension and diabetes in hospitalized  
47  
48 patients.(9) Because both coronaviruses enter the cell through the angiotensin converting  
49  
50 enzyme 2 (ACE2) receptor, a hypothesis has become that upregulation of ACE2 in patients  
51  
52 with hypertension and/or diabetes facilitates transmission of the virus.(21–24) However,  
53  
54 recent studies have shown no association between the use of RAS-medication and the disease  
55  
56  
57  
58  
59  
60

1  
2  
3 course of COVID-19.(25,26) Furthermore, this theory does not explain the increased risk of  
4 mortality paired with other CVD risk factors in COVID-19 patients. An alternative  
5 explanation is that CVD risk factors predispose to myocardial injury in COVID-19 infected  
6 patients, which is likely to contribute to a more severe clinical course.(27,28) Two recent  
7 studies revealed viral RNA in the myocardium of COVID-19 patients, suggesting that SARS-  
8 CoV-2 might infect the heart directly. It can be speculated that those with (pre-clinical)  
9 atherosclerosis are prone to experience coronary ischemia from viral myocardial  
10 involvement.(29,30)

11  
12  
13  
14  
15  
16  
17  
18  
19  
20  
21  
22  
23  
24 In our cohort of COVID-19 patients, the presence of diabetes had the strongest association  
25 with mortality and remained significant after adjustment for covariates such as smoking,  
26 obesity, and the use of beta-blockers and antiplatelet drugs as surrogate for coronary artery  
27 disease. We observed smaller effect sizes for the presence of hypertension and dyslipidemia.  
28 These findings might suggest that diabetes predisposes for adverse outcomes in COVID-19  
29 patients not only through its association with CVD, but potentially via other  
30 pathophysiological pathways specific to diabetes. A recent Chinese cohort showed diabetes to  
31 be associated with higher ICU-admission and more in-hospital mortality, but not  
32 independently of hypertension and history of CVD.(8) Interestingly, in those with diabetes,  
33 hypertension was associated with in-hospital death, independently of history of CVD, further  
34 supporting the additive effect of CVD risk factors on COVID-19 mortality. Nevertheless, it is  
35 hard to disentangle the precise relation based on epidemiological data. In line with current  
36 guidelines on CVD risk management, cardiovascular medication from different classes were  
37 often prescribed together in our cohort, also in patients with diabetes.(31) This makes it  
38 difficult to assess their separate contribution to mortality. It remains, therefore, unknown  
39 whether diabetes alone is associated with a higher risk of adverse outcomes or whether it is  
40  
41  
42  
43  
44  
45  
46  
47  
48  
49  
50  
51  
52  
53  
54  
55  
56  
57  
58  
59  
60

1  
2  
3 merely a reflection of increased vascular ageing in combination with the other risk  
4  
5 factors.(32) In contrast to our results, the recent cohort of Cummings et al, found that among  
6  
7 cardiovascular risk factors, only chronic cardiac disease was a strong predictor for hospital  
8  
9 mortality, while smaller associations were found for other risk factors, including diabetes.(18)  
10  
11 In line, a recent Italian cohort of hospitalized COVID-19 patients showed an increased  
12  
13 prevalence of hypertension and diabetes amongst non-survivors, but only diabetes was an  
14  
15 independent predictor after adjustment for other comorbidities.(33) In the present study, the  
16  
17 cumulative presence of CVD risk factors did not show an association with increased risk for  
18  
19 ICU-admission. This may have been influenced by selection prior to ICU admission, where  
20  
21 the presence of co-morbidity was taken into account in the shared decision-making process,  
22  
23 leading to a relative underrepresentation of patients with CVD risk factors.  
24  
25  
26  
27  
28  
29  
30

31 The present analysis has several limitations. First, data collection was based on data collection  
32  
33 forms of the WHO, which did not include detailed information on cardiovascular disease  
34  
35 history. For this reason, we relied on medication use as a surrogate marker for established  
36  
37 cardiovascular risk factors or disease, which has been used before in big cohort studies.(34)  
38  
39 Nevertheless, some of these drugs might have been prescribed for different indications, The  
40  
41 current study was not designed to assess the relationship between specific drugs and COVID-  
42  
43 19 outcomes. Secondly, we only obtained follow-up during the first 21 days, however as  
44  
45 depicted in the Kaplan-Meier analysis, almost all events occurred during the first 14 days, in  
46  
47 line with earlier descriptions.(4) Finally, we cannot exclude that mortality in the current study  
48  
49 is partially caused by other factors than COVID-19. However, as we used 21-day mortality as  
50  
51 our primary outcome and only included patients admitted to the hospital with confirmed  
52  
53 COVID-19 infection, it is very likely that the majority of deaths were directly attributable to  
54  
55 COVID-19.  
56  
57  
58  
59  
60



1  
2  
3  
4  
5 In conclusion, the accumulation of CVD risk factors leads to a stepwise increased risk for  
6 short-term mortality in hospitalized COVID-19 patients. Patients with diabetes had the  
7 highest risk, followed by similar risks for hypertension and dyslipidemia. Mechanistic studies  
8 investigating how CVD risk factors disproportionately affect COVID-19 patients compared to  
9 other infectious diseases are warranted.  
10  
11  
12  
13  
14  
15  
16  
17  
18

### 19 **Acknowledgements**

20 We would like to thank the CovidPredict consortium ([www.covidpredict.org](http://www.covidpredict.org)) for their efforts  
21 in providing the patient data.  
22  
23  
24  
25  
26  
27

### 28 **Author contributions**

29 DC, NN, YK, LR, ES, BJvdB, LV, MB, PE conceptualized and designed the study. TD, HM,  
30 SS, RD, AE, AR contributed substantially to the acquisition of data. DC, NN, YK, LR  
31 performed the data analysis. DC, NN, YK, LR, ES, BJvdB drafted the manuscript. TD, HM,  
32 SS, RD, AE, AR, PE, MB, LV critically revised the manuscript. All authors have provided  
33 final approval of the version to be submitted and agree to be accountable for all aspects of the  
34 work in ensuring that questions related to the accuracy or integrity of any part of the work are  
35 appropriately investigated and resolved..  
36  
37  
38  
39  
40  
41  
42  
43  
44  
45  
46  
47  
48

### 49 **Funding**

50 DC is supported by a ZonMW grant (project number: 10430022010002).  
51  
52  
53  
54  
55

### 56 **Competing interests**

1  
2  
3 N.S.N. and L.F.R. are co-founders of Lipid Tools. E.S.G.S. reports personal fees from  
4  
5 Amgen, personal fees from Sanofi-Regeneron, personal fees from Esperion, grants from  
6  
7 Athera, outside the submitted work.  
8  
9

### 10 11 12 **Data availability statement** 13

14 The data that support the findings of this study are available from the corresponding author,  
15  
16 upon reasonable request.  
17  
18  
19  
20  
21  
22  
23  
24  
25  
26  
27  
28  
29  
30  
31  
32  
33  
34  
35  
36  
37  
38  
39  
40  
41  
42  
43  
44  
45  
46  
47  
48  
49  
50  
51  
52  
53  
54  
55  
56  
57  
58  
59  
60

For peer review only

## References

1. World Health Organization. Coronavirus disease 2019 (COVID-19), situation report 92.
2. Lipsitch M, Swerdlow DL, Finelli L. Defining the Epidemiology of Covid-19 - Studies Needed. *N Engl J Med*. 2020 Mar;382(13):1194–6.
3. Wilkins JT, Ning H, Berry J, Zhao L, Dyer AR, Lloyd-Jones DM. Lifetime risk and years lived free of total cardiovascular disease. *JAMA*. 2012;308(17):1795–801.
4. Zhou F, Yu T, Du R, Fan G, Liu Y, Liu Z, et al. Clinical course and risk factors for mortality of adult inpatients with COVID-19 in Wuhan, China: a retrospective cohort study. *Lancet*. 2020;
5. Zheng YY, Ma YT, Zhang JY, Xie X. COVID-19 and the cardiovascular system. *Nat Rev Cardiol*. 2020 Mar;17:259–60.
6. Nguyen JL, Yang W, Ito K, Matte TD, Shaman J, Kinney PL. Seasonal influenza infections and cardiovascular disease mortality. *JAMA Cardiol*. 2016 Jun;1(3):274–81.
7. Corrales-Medina VF, Musher DM, Wells GA, Chirinos JA, Chen L, Fine MJ. Cardiac complications in patients with community-acquired pneumonia incidence, timing, risk factors, and association with short-term mortality. *Circulation*. 2012 Feb;125(6):773–81.
8. Shi Q, Zhang X, Jiang F, Zhang X, Hu N, Bimu C, et al. Clinical Characteristics and Risk Factors for Mortality of COVID-19 Patients With Diabetes in Wuhan, China: A Two-Center, Retrospective Study. *Diabetes Care*. 2020;43(7):1382–91.
9. Badawi A, Ryoo SG. Prevalence of comorbidities in the Middle East respiratory syndrome coronavirus (MERS-CoV): a systematic review and meta-analysis. *Int J Infect Dis*. 2016 Aug;49:129–33.
10. Peters EJG, Collard D, Van Assen S, Beudel M, Bomers MK, Buijs J, et al. Outcomes

- 1  
2  
3 of persons with COVID-19 in hospitals with and without standard treatment with  
4 (Hydroxy)chloroquine. *Clin Microbiol Infect.* 2020;(xxxx):0–4.  
5  
6  
7  
8 11. Bai HX, Hsieh B, Xiong Z, Halsey K, Choi JW, Tran TML, et al. Performance of  
9 radiologists in differentiating COVID-19 from viral pneumonia on chest CT.  
10 *Radiology.* 2020;200823.  
11  
12  
13  
14 12. Prokop M, Van Everdingen W, Van Rees Vellinga T, Van Ufford HQ, Stöger L,  
15 Beenen L, et al. CO-RADS: A Categorical CT Assessment Scheme for Patients  
16 Suspected of Having COVID-19-Definition and Evaluation. *Radiology.*  
17 2020;296(2):E97–104.  
18  
19  
20  
21  
22  
23  
24 13. van Laer SD, Snijder MB, Agyemang C, Peters RJG, van den Born BJH. Ethnic  
25 differences in hypertension prevalence and contributing determinants – the HELIUS  
26 study. *Eur J Prev Cardiol.* 2018;25(18):1914–22.  
27  
28  
29  
30  
31 14. Guan WJ, Ni ZY, Hu Y, Liang WH, Ou CQ, He JX, et al. Clinical Characteristics of  
32 Coronavirus Disease 2019 in China. *N Engl J Med.* 2020;1–13.  
33  
34  
35  
36 15. Onder G, Rezza G, Brusaferro S. Case-Fatality Rate and Characteristics of Patients  
37 Dying in Relation to COVID-19 in Italy. *JAMA - J Am Med Assoc.* 2020;2019:2019–  
38 20.  
39  
40  
41  
42 16. Richardson S, Hirsch JS, Narasimhan M, Crawford JM, McGinn T, Davidson KW, et  
43 al. Presenting Characteristics, Comorbidities, and Outcomes Among 5700 Patients  
44 Hospitalized With COVID-19 in the New York City Area. *Jama.* 2020;10022:1–8.  
45  
46  
47  
48  
49 17. Goyal P, Choi JJ, Pinheiro LC, Schenck EJ, Chen R, Jabri A, et al. Clinical  
50 Characteristics of Covid-19 in New York City. *N Engl J Med.* 2020 Apr 17;  
51  
52  
53  
54 18. Cummings MJ, Baldwin MR, Abrams D, Jacobson SD, Meyer BJ, Balough EM, et al.  
55 Epidemiology, clinical course, and outcomes of critically ill adults with COVID-19 in  
56 New York City: a prospective cohort study. *Lancet [Internet].* 2020;S0140-  
57  
58  
59  
60

- 1  
2  
3 6736(20)31189-2. Available from: [http://dx.doi.org/10.1016/S0140-6736\(20\)31189-2](http://dx.doi.org/10.1016/S0140-6736(20)31189-2)  
4  
5  
6 19. Corrales-Medina VF, Musher DM, Shachkina S, Chirinos JA. Acute pneumonia and  
7  
8 the cardiovascular system. *Lancet*. 2013;381(9865):496–505.  
9  
10  
11 20. Violi F, Cangemi R, Falcone M, Taliani G, Pieralli F, Vannucchi V, et al.  
12  
13 Cardiovascular complications and short-term mortality risk in community-acquired  
14  
15 pneumonia. *Clin Infect Dis*. 2017;64(11):1486–93.  
16  
17 21. Fang L, Karakiulakis G, Roth M. Are patients with hypertension and diabetes mellitus  
18  
19 at increased risk for COVID-19 infection? *Lancet Respir Med*. 2020 Apr;8(4):e21.  
20  
21 22. Vaduganathan M, Vardeny O, Michel T, McMurray JJ V, Pfeffer MA, Solomon SD.  
22  
23 Renin-Angiotensin-Aldosterone System Inhibitors in Patients with Covid-19. *N Engl J*  
24  
25 *Med*. 2020 Mar;  
26  
27  
28 23. Kuster GM, Pfister O, Burkard T, Zhou Q, Twerenbold R, Haaf P, et al. SARS-CoV2:  
29  
30 should inhibitors of the renin–angiotensin system be withdrawn in patients with  
31  
32 COVID-19? *Eur Heart J*. 2020 Mar;  
33  
34  
35 24. Danser AHHJ, Epstein M, Batlle D. Renin-Angiotensin System Blockers and the  
36  
37 COVID-19 Pandemic: At Present There Is No Evidence to Abandon Renin-  
38  
39 Angiotensin System Blockers. *Hypertension*. 2020 Mar;  
40  
41  
42 25. Mackey K, King VJ, Gurley S, Kiefer M, Liederbauer E, Vela K, et al. Risks and  
43  
44 Impact of Angiotensin-Converting Enzyme Inhibitors or Angiotensin-Receptor  
45  
46 Blockers on SARS-CoV-2 Infection in Adults. *Ann Intern Med* [Internet]. 2020 May  
47  
48 15; Available from: <https://doi.org/10.7326/M20-1515>  
49  
50  
51 26. Mancia G, Rea F, Ludergnani M, Apolone G, Corrao G. Renin–angiotensin–  
52  
53 aldosterone system blockers and the risk of COVID-19. *N Engl J Med*.  
54  
55 2020;382(25):2431–40.  
56  
57  
58 27. Shi S, Qin M, Shen B, Cai Y, Liu T, Yang F, et al. Association of Cardiac Injury with  
59  
60

- 1  
2  
3 Mortality in Hospitalized Patients with COVID-19 in Wuhan, China. *JAMA Cardiol.*  
4  
5 2020;  
6  
7  
8 28. Atallah B, Mallah SI, AbdelWareth L, AlMahmeed W, Fonarow GC. A marker of  
9  
10 systemic inflammation or direct cardiac injury: should cardiac troponin levels be  
11  
12 monitored in COVID-19 patients? *Eur Hear journal Qual care Clin outcomes.*  
13  
14 2020;6(3):204–7.  
15  
16  
17 29. Wichmann D, Sperhake J-P, Lütgehetmann M, Steurer S, Edler C, Heinemann A, et al.  
18  
19 Autopsy Findings and Venous Thromboembolism in Patients With COVID-19. *Ann*  
20  
21 *Intern Med* [Internet]. 2020 May 6; Available from: <https://doi.org/10.7326/M20-2003>  
22  
23  
24 30. Schaller T, Hirschbühl K, Burkhardt K, Braun G, Trepel M, Märkl B, et al. Postmortem  
25  
26 Examination of Patients with COVID-19. *JAMA - J Am Med Assoc.*  
27  
28 2020;323(24):2518–20.  
29  
30  
31 31. The Task Force for the management of arterial hypertension of the European Society of  
32  
33 Cardiology (ESC) and the European Society of Hypertension (ESH). 2018 ESC/ESH  
34  
35 Guidelines for the management of arterial hypertension. *Eur Heart J.* 2018 Aug  
36  
37 25;39(33):3021–104.  
38  
39  
40 32. Ungvari Z, Tarantini S, Donato AJ, Galvan V, Csiszar A. Mechanisms of vascular  
41  
42 aging. *Circ Res.* 2018;123(7):849–67.  
43  
44  
45 33. Iaccarino G, Grassi G, Borghi C, Ferri C, Salvetti M, Volpe M. Age and  
46  
47 Multimorbidity Predict Death Among COVID-19 Patients: Results of the SARS-RAS  
48  
49 Study of the Italian Society of Hypertension. *Hypertens (Dallas, Tex 1979).*  
50  
51 2020;76(2):366–72.  
52  
53  
54 34. Attaei MW, Khatib R, McKee M, Lear S, Dagenais G, Igumbor EU, et al. Availability  
55  
56 and affordability of blood pressure-lowering medicines and the effect on blood pressure  
57  
58 control in high-income, middle-income, and low-income countries: an analysis of the  
59  
60

1  
2  
3  
4  
5  
6  
7  
8  
9  
10  
11  
12  
13  
14  
15  
16  
17  
18  
19  
20  
21  
22  
23  
24  
25  
26  
27  
28  
29  
30  
31  
32  
33  
34  
35  
36  
37  
38  
39  
40  
41  
42  
43  
44  
45  
46  
47  
48  
49  
50  
51  
52  
53  
54  
55  
56  
57  
58  
59  
60

PURE study data. Lancet Public Heal. 2017;2(9):e411–9.

For peer review only

## Figure legends

### **Figure 1. Survival and time-to event analysis of cumulative cardiovascular risk factors on mortality, ICU-admission and ICU-mortality**

Kaplan-Meier analysis of hypertension, dyslipidemia and diabetes stratified into 0, 1 or more risk factors versus adverse clinical outcomes. Panel (A) depicts mortality, panel (B) ICU-admission. Panel (C) depicts ICU-mortality, for which a landmark analysis following ICU-admission was performed. Log-rank test was used to test for differences between curves. RF, risk factor; ICU, intensive care unit.



**Table 1.** Baseline characteristics

|                                                      | <b>Overall</b>   | <b>0 RF</b>      | <b>1 RF</b>      | <b>≥2 RF</b>     | <b>p</b> |
|------------------------------------------------------|------------------|------------------|------------------|------------------|----------|
| n                                                    | 1604             | 680              | 400              | 524              |          |
| Age (mean (SD))                                      | 65.67<br>(15.06) | 58.59<br>(15.71) | 69.93<br>(13.01) | 71.62<br>(11.45) | <0.001   |
| Women                                                | 633 (39.5)       | 298 (43.8)       | 170 (42.5)       | 165 (31.5)       | <0.001   |
| Chronic cardiac disease                              | 467 (29.2)       | 71 (10.5)        | 117 (29.3)       | 279 (53.4)       | <0.001   |
| Hypertension                                         | 734 (46.0)       | 80 (11.8)        | 242 (60.8)       | 412 (78.8)       | <0.001   |
| Chronic pulmonary disease                            | 288 (18.0)       | 92 (13.6)        | 82 (20.6)        | 114 (21.9)       | <0.001   |
| Asthma                                               | 179 (11.2)       | 77 (11.4)        | 41 (10.3)        | 61 (11.7)        | 0.793    |
| Chronic kidney disease                               | 150 (9.4)        | 17 (2.5)         | 48 (12.0)        | 85 (16.3)        | <0.001   |
| Diabetes                                             | 411 (25.7)       | 19 (2.8)         | 66 (16.5)        | 326 (62.3)       | <0.001   |
| Malignant neoplasm                                   | 98 (6.2)         | 36 (5.3)         | 25 (6.3)         | 37 (7.1)         | 0.455    |
| Chronic hematologic disorder                         | 57 (3.6)         | 32 (4.7)         | 11 (2.8)         | 14 (2.7)         | 0.1      |
| Smoking                                              | 78 (6.5)         | 30 (6.0)         | 16 (5.4)         | 32 (7.8)         | 0.383    |
| Obesity                                              | 464 (30.8)       | 164 (26.1)       | 112 (29.4)       | 188 (37.8)       | <0.001   |
| Combined use of beta-blockers and antiplatelet drugs | 167 (10.4)       | 7 (1.0)          | 35 (8.8)         | 125 (23.9)       | <0.001   |
| Antihypertensive-Rx                                  |                  |                  |                  |                  | <0.001   |
| 0                                                    | 883 (55.0)       | 680 (100.0)      | 145 (36.2)       | 58 (11.1)        |          |
| 1                                                    | 377 (23.5)       | 0 (0.0)          | 141 (35.2)       | 236 (45.0)       |          |
| 2                                                    | 282 (17.6)       | 0 (0.0)          | 95 (23.8)        | 187 (35.7)       |          |
| ≥ 3                                                  | 62 (3.9)         | 0 (0.0)          | 19 (4.8)         | 43 (8.2)         |          |
| Lipid-lowering-Rx                                    |                  |                  |                  |                  | <0.001   |
| 0                                                    | 1047 (65.3)      | 0 (0.0)          | 296 (74.0)       | 89 (13.5)        |          |
| ≥ 1                                                  | 557 (34.7)       | 0 (0.0)          | 104 (26.0)       | 453 (86.5)       |          |
| Glucose-lowering-Rx                                  |                  |                  |                  |                  | <0.001   |
| 0                                                    | 1250 (77.9)      | 680 (100.0)      | 359 (89.8)       | 211 (40.3)       |          |
| 1                                                    | 170 (10.6)       | 0 (0.0)          | 23 (5.8)         | 147 (28.1)       |          |
| ≥ 2                                                  | 184 (11.5)       | 0 (0.0)          | 18 (4.5)         | 166 (31.7)       |          |

RF, risk factor; SD, standard deviation; IQR, interquartile range; Rx, medication. P-values indicate comparison between subgroups based on the presence of cumulative risk factors.

**Table 2.** Effect of cumulative cardiovascular risk factors on primary and secondary outcomes

|               | Cumulative risk factors | Model 1 |       |      |       | Model 2 |       |      |       |
|---------------|-------------------------|---------|-------|------|-------|---------|-------|------|-------|
|               |                         | HR      | 95%CI | p    |       | HR      | 95%CI | p    |       |
| Mortality     | 0 RF                    | 1 (ref) |       |      |       | 1 (ref) |       |      |       |
|               | 1 RF                    | 1.04    | 0.76  | 1.43 | 0.786 | 1.01    | 0.73  | 1.39 | 0.956 |
|               | ≥2 RF                   | 1.52    | 1.15  | 2.02 | 0.004 | 1.38    | 1.02  | 1.86 | 0.034 |
| ICU admission | 0 RF                    | 1 (ref) |       |      |       | 1 (ref) |       |      |       |
|               | 1 RF                    | 1.11    | 0.80  | 1.53 | 0.534 | 1.06    | 0.77  | 1.47 | 0.723 |
|               | ≥2 RF                   | 1.15    | 0.85  | 1.56 | 0.355 | 1.07    | 0.77  | 1.48 | 0.681 |
| ICU-mortality | 0 RF                    | 1 (ref) |       |      |       | 1 (ref) |       |      |       |
|               | 1 RF                    | 0.86    | 0.46  | 1.60 | 0.625 | 1.01    | 0.73  | 1.39 | 0.957 |
|               | ≥2 RF                   | 1.52    | 0.90  | 2.55 | 0.115 | 1.38    | 1.02  | 1.86 | 0.035 |

Cox-regression for the effect of cumulative cardiovascular risk factors on mortality, ICU-admission and ICU-mortality, after adjustment for sex and age (model 1), and with additional adjustments for obesity, smoking and history of coronary artery disease (model 2). HR, hazard ratio; CI, confidence interval; ICU, intensive care unit.

**Table 3.** Effect of antihypertensive, lipid-lowering, and antidiabetic medications on mortality

| Mortality              | Model 1 |       |      |        | Model 2 |       |      |        |
|------------------------|---------|-------|------|--------|---------|-------|------|--------|
|                        | HR      | 95%CI |      | p      | HR      | 95%CI |      | p      |
| 0 antihypertensive-Rx  | 1 (ref) |       |      |        | 1 (ref) |       |      |        |
| 1 antihypertensive-Rx  | 1.08    | 0.81  | 1.43 | 0.597  | 1.04    | 0.78  | 1.38 | 0.79   |
| ≥2 antihypertensive-Rx | 1.46    | 1.11  | 1.91 | 0.006  | 1.33    | 1.01  | 1.76 | 0.043  |
| 0 lipid-lowering-Rx    | 1 (ref) |       |      |        | 1 (ref) |       |      |        |
| ≥1 lipid-lowering-Rx   | 1.25    | 0.99  | 1.56 | 0.058  | 1.14    | 0.89  | 1.45 | 0.292  |
| 0 antidiabetic-Rx      | 1 (ref) |       |      |        | 1 (ref) |       |      |        |
| 1 antidiabetic-Rx      | 1.34    | 0.97  | 1.85 | 0.077  | 1.25    | 0.9   | 1.74 | 0.182  |
| ≥2 antidiabetic-Rx     | 2.09    | 1.55  | 2.80 | <0.001 | 1.93    | 1.43  | 2.62 | <0.001 |

Cox-regression for the effect of the number of antihypertensive, lipid-lowering and antidiabetic drug classes on 21-day mortality, defined as either hospital mortality or discharge for palliative care, with adjustment for age and sex (model 1), and with additional adjustments for obesity, smoking and history of coronary artery disease (model 2). Rx, medication; HR, hazard ratio; CI, confidence interval.

### A. Mortality

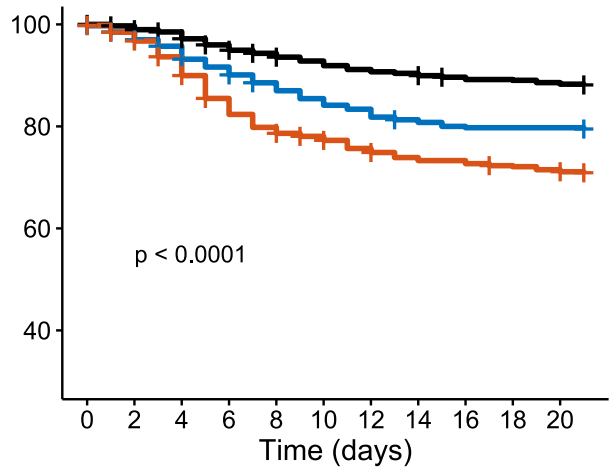

### B. ICU-admission

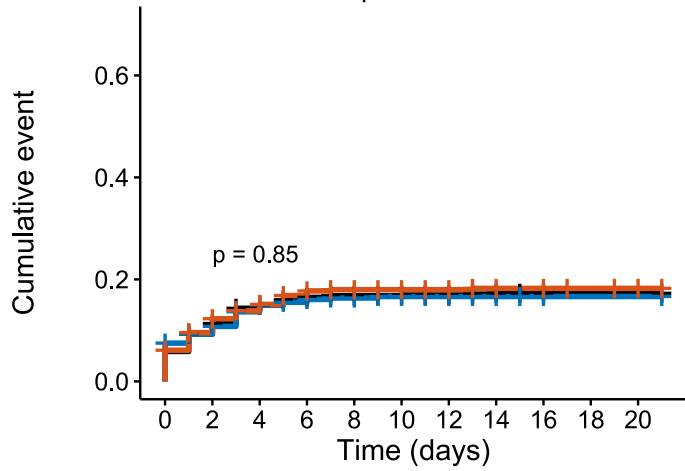

### C. ICU-mortality

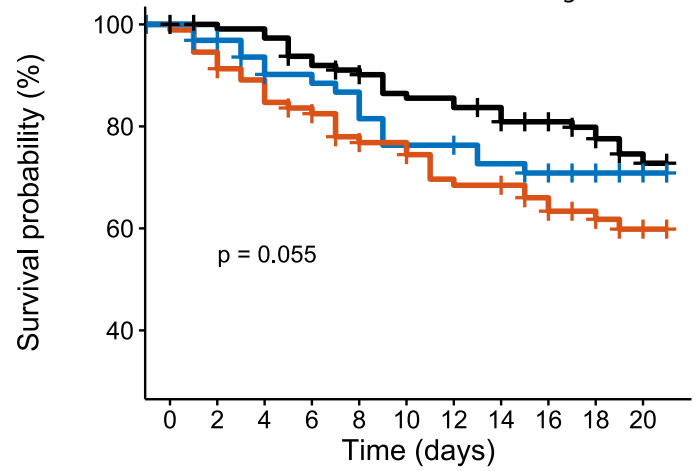

**Number at risk**

|        |     |     |     |     |     |     |     |     |     |     |     |
|--------|-----|-----|-----|-----|-----|-----|-----|-----|-----|-----|-----|
| 0 RF   | 680 | 674 | 660 | 640 | 626 | 614 | 603 | 598 | 591 | 588 | 584 |
| 1 RF   | 400 | 391 | 376 | 357 | 342 | 330 | 322 | 313 | 308 | 307 | 307 |
| >=2 RF | 524 | 512 | 483 | 437 | 408 | 396 | 382 | 372 | 369 | 363 | 359 |

**Number at risk**

|        |     |     |     |     |     |     |     |     |     |     |     |
|--------|-----|-----|-----|-----|-----|-----|-----|-----|-----|-----|-----|
| 0 RF   | 680 | 613 | 568 | 542 | 525 | 516 | 508 | 505 | 501 | 499 | 499 |
| 1 RF   | 400 | 357 | 327 | 304 | 291 | 283 | 277 | 271 | 268 | 267 | 267 |
| >=2 RF | 524 | 466 | 418 | 364 | 336 | 328 | 319 | 313 | 311 | 308 | 306 |

**Number at risk**

|        |     |     |     |     |     |    |    |    |    |    |    |
|--------|-----|-----|-----|-----|-----|----|----|----|----|----|----|
| 0 RF   | 115 | 112 | 111 | 104 | 100 | 94 | 93 | 90 | 81 | 71 | 41 |
| 1 RF   | 64  | 60  | 55  | 52  | 50  | 44 | 44 | 40 | 38 | 34 | 22 |
| >=2 RF | 92  | 87  | 81  | 75  | 68  | 65 | 58 | 57 | 50 | 40 | 25 |

Risk factors  
0 RF  
1 RF  
>=2 RF

Risk factors  
0 RF  
1 RF  
>=2 RF

Risk factors  
0 RF  
1 RF  
>=2 RF

1  
2  
3 **Supplement 1: Baseline characteristics in subset with detailed clinical history**  
4

5 In three of the participating hospitals (Amsterdam UMC location AMC, Amsterdam UMC  
6 location VUMC, Flevoziekenhuis), we collected additional clinical information to validate the  
7 medication use as surrogate marker for cardiovascular risk factors and disease, depicted in the  
8  
9  
10  
11  
12  
13  
14  
15  
16  
17  
18  
19  
20  
21  
22  
23  
24  
25  
26  
27  
28  
29  
30  
31  
32  
33  
34  
35  
36  
37  
38  
39  
40  
41  
42  
43  
44  
45  
46  
47  
48  
49  
50  
51  
52  
53  
54  
55  
56  
57  
58  
59  
60  
table below.

For peer review only

**Supplementary table:** Baseline characteristics of complete cohort, and subgroup where additional information about prior cardiovascular events was available.

| n                                                    | Overall<br>1604 | Subset<br>566 |
|------------------------------------------------------|-----------------|---------------|
| Age (mean (SD))                                      | 65.67 (15.06)   | 61.37 (14.60) |
| Women                                                | 633 (39.5)      | 241 (42.6)    |
| Chronic cardiac disease                              | 467 (29.2)      | 125 (22.1)    |
| Hypertension                                         | 734 (46.0)      | 252 (44.8)    |
| Chronic pulmonary disease                            | 288 (18.0)      | 77 (13.6)     |
| Asthma                                               | 179 (11.2)      | 56 (9.9)      |
| Chronic kidney disease                               | 150 (9.4)       | 57 (10.1)     |
| Diabetes                                             | 411 (25.7)      | 154 (27.2)    |
| Malignant neoplasm                                   | 98 (6.2)        | 31 (5.5)      |
| Chronic hematologic disorder                         | 57 (3.6)        | 23 (4.1)      |
| Smoking                                              | 78 (6.5)        | 28 (6.2)      |
| Obesity                                              | 464 (30.8)      | 168 (32.8)    |
| Combined use of beta-blockers and antiplatelet drugs | 167 (10.4)      | 50 (8.8)      |
| History of coronary artery disease                   |                 | 74 (13.1)     |
| History of heart failure                             |                 | 21 (3.7)      |
| History of stroke                                    |                 | 42 (7.4)      |
| History of peripheral artery disease                 |                 | 9 (1.6)       |
| Antihypertensive-Rx                                  |                 |               |
| 0                                                    | 883 (55.0)      | 327 (57.8)    |
| 1                                                    | 377 (23.5)      | 126 (22.3)    |
| 2                                                    | 282 (17.6)      | 81 (14.3)     |
| ≥ 3                                                  | 62 (3.9)        | 32 (5.7)      |
| Lipid-lowering-Rx                                    |                 |               |
| 0                                                    | 1047 (65.3)     | 399 (70.5)    |
| ≥ 1                                                  | 557 (34.7)      | 167 (29.5)    |
| Glucose-lowering-Rx                                  |                 |               |
| 0                                                    | 1250 (77.9)     | 435 (76.9)    |
| 1                                                    | 170 (10.6)      | 60 (10.6)     |
| ≥ 2                                                  | 184 (11.5)      | 71 (12.5)     |

RF, risk factor; SD, standard deviation; IQR, interquartile range, Rx medication.

Cox-regression for the effect of the number of antihypertensive, lipid-lowering and antidiabetic drug classes on mortality. Table depicts results from multivariate analysis

1  
2  
3 including age, sex, obesity, current smoker and the use of beta-blockers and antiplatelet  
4  
5 medication. Rx, medication; HR, hazard ratio; CI, confidence interval.  
6  
7  
8  
9  
10  
11  
12  
13  
14  
15  
16  
17  
18  
19  
20  
21  
22  
23  
24  
25  
26  
27  
28  
29  
30  
31  
32  
33  
34  
35  
36  
37  
38  
39  
40  
41  
42  
43  
44  
45  
46  
47  
48  
49  
50  
51  
52  
53  
54  
55  
56  
57  
58  
59  
60

For peer review only

1  
2  
3 **Supplement 2: Cox-regression models with additional correction for smoking, obesity**  
4 **and the use of both a beta-blocker and antiplatelet drug.**  
5  
6  
7  
8

9 We performed an additional analysis for the association between the cardiovascular risk  
10 factors and mortality with adjustment for smoking, obesity and the use of both a beta-blocker  
11 and antiplatelet drug. Data for smoking status was missing for 22.7% of the patients, data for  
12 obesity was missing for 9.2% of the patients. Imputation for these covariates was performed  
13 using the Multivariate Imputation by Chained (mice) package version 3.8.0. The pooled  
14 results averaged over 25 iterations are depicted in the table below. A complete cases analysis  
15 showed similar results (data not shown).  
16  
17  
18  
19  
20  
21  
22  
23  
24  
25  
26  
27  
28  
29  
30  
31  
32  
33  
34  
35  
36  
37  
38  
39  
40  
41  
42  
43  
44  
45  
46  
47  
48  
49  
50  
51  
52  
53  
54  
55  
56  
57  
58  
59  
60



**Supplementary table:** Effect of the cumulative risk factors, antihypertensive medication, lipid-lowering medication and antidiabetic medication on mortality after adjustment for covariates.

| Covariate                                | Mortality |       |         |        | Covariate                                | IC-admission |       |         |        | Covariate                                | IC-mortality |       |         |        |
|------------------------------------------|-----------|-------|---------|--------|------------------------------------------|--------------|-------|---------|--------|------------------------------------------|--------------|-------|---------|--------|
|                                          | HR        | 95%CI | P-value |        |                                          | HR           | 95%CI | P-value |        |                                          | HR           | 95%CI | P-value |        |
| <b>1 RF</b>                              | 1.01      | 0.73  | 1.39    | 0.956  | <b>1 RF</b>                              | 1.06         | 0.77  | 1.47    | 0.723  | <b>1 RF</b>                              | 1.01         | 0.73  | 1.39    | 0.957  |
| <b>≥2 RF</b>                             | 1.38      | 1.02  | 1.86    | 0.034  | <b>≥2 RF</b>                             | 1.07         | 0.77  | 1.48    | 0.681  | <b>≥2 RF</b>                             | 1.38         | 1.02  | 1.86    | 0.035  |
| <b>Women</b>                             | 0.94      | 0.74  | 1.19    | 0.612  | <b>Women</b>                             | 0.45         | 0.34  | 0.59    | <0.001 | <b>Women</b>                             | 0.94         | 0.74  | 1.19    | 0.612  |
| <b>Age</b>                               | 1.07      | 1.06  | 1.08    | <0.001 | <b>Age</b>                               | 0.99         | 0.98  | 1.00    | 0.023  | <b>Age</b>                               | 1.07         | 1.06  | 1.08    | <0.001 |
| <b>Beta-blockers and antiplatelet-Rx</b> | 1.27      | 0.93  | 1.73    | 0.13   | <b>Beta-blockers and antiplatelet-Rx</b> | 1.10         | 0.73  | 1.67    | 0.648  | <b>Beta-blockers and antiplatelet-Rx</b> | 1.27         | 0.93  | 1.73    | 0.131  |
| <b>Obesity</b>                           | 1.26      | 0.97  | 1.65    | 0.086  | <b>Obesity</b>                           | 1.31         | 1.01  | 1.71    | 0.042  | <b>Obesity</b>                           | 1.26         | 0.97  | 1.65    | 0.087  |
| <b>Current smoker</b>                    | 0.83      | 0.46  | 1.5     | 0.533  | <b>Current smoker</b>                    | 0.66         | 0.37  | 1.19    | 0.167  | <b>Current smoker</b>                    | 0.83         | 0.46  | 1.50    | 0.534  |

| Covariate                                | Mortality |       |         |        | Covariate                                | Mortality |       |         |        | Covariate                                | Mortality |       |         |        |
|------------------------------------------|-----------|-------|---------|--------|------------------------------------------|-----------|-------|---------|--------|------------------------------------------|-----------|-------|---------|--------|
|                                          | HR        | 95%CI | P-value |        |                                          | HR        | 95%CI | P-value |        |                                          | HR        | 95%CI | P-value |        |
| <b>1 BP-lowering-Rx</b>                  | 1.04      | 0.78  | 1.38    | 0.79   | <b>1 lipid-lowering-Rx</b>               | 1.14      | 0.89  | 1.45    | 0.292  | <b>1 antidiabetic-Rx</b>                 | 1.25      | 0.9   | 1.74    | 0.182  |
| <b>≥2 BP-lowering-Rx</b>                 | 1.33      | 1.01  | 1.76    | 0.043  |                                          |           |       |         |        | <b>≥2 antidiabetic-Rx</b>                | 1.93      | 1.43  | 2.62    | <0.001 |
| <b>Women</b>                             | 0.9       | 0.72  | 1.14    | 0.391  | <b>Women</b>                             | 0.92      | 0.73  | 1.17    | 0.502  | <b>Women</b>                             | 0.93      | 0.74  | 1.17    | 0.538  |
| <b>Age</b>                               | 1.07      | 1.06  | 1.08    | <0.001 | <b>Age</b>                               | 1.07      | 1.06  | 1.08    | <0.001 | <b>Age</b>                               | 1.07      | 1.06  | 1.08    | <0.001 |
| <b>Beta-blockers and antiplatelet-Rx</b> | 1.34      | 0.99  | 1.82    | 0.056  | <b>Beta-blockers and antiplatelet-Rx</b> | 1.36      | 1     | 1.86    | 0.051  | <b>Beta-blockers and antiplatelet-Rx</b> | 1.34      | 0.99  | 1.8     | 0.057  |
| <b>Obesity</b>                           | 1.27      | 0.97  | 1.66    | 0.078  | <b>Obesity</b>                           | 1.3       | 1     | 1.69    | 0.051  | <b>Obesity</b>                           | 1.18      | 0.9   | 1.55    | 0.226  |
| <b>Current smoker</b>                    | 0.87      | 0.5   | 1.51    | 0.615  | <b>Current smoker</b>                    | 0.87      | 0.5   | 1.52    | 0.624  | <b>Current smoker</b>                    | 0.91      | 0.52  | 1.58    | 0.725  |

**STROBE 2007 (v4) Statement—Checklist of items that should be included in reports of *cohort studies***

| Section/Topic                | Item # | Recommendation                                                                                                                                                                       | Reported on page # |
|------------------------------|--------|--------------------------------------------------------------------------------------------------------------------------------------------------------------------------------------|--------------------|
| <b>Title and abstract</b>    | 1      | (a) Indicate the study's design with a commonly used term in the title or the abstract                                                                                               | 1                  |
|                              |        | (b) Provide in the abstract an informative and balanced summary of what was done and what was found                                                                                  | 2                  |
| <b>Introduction</b>          |        |                                                                                                                                                                                      |                    |
| Background/rationale         | 2      | Explain the scientific background and rationale for the investigation being reported                                                                                                 | 4                  |
| Objectives                   | 3      | State specific objectives, including any prespecified hypotheses                                                                                                                     | 4                  |
| <b>Methods</b>               |        |                                                                                                                                                                                      |                    |
| Study design                 | 4      | Present key elements of study design early in the paper                                                                                                                              | 5                  |
| Setting                      | 5      | Describe the setting, locations, and relevant dates, including periods of recruitment, exposure, follow-up, and data collection                                                      | 5                  |
| Participants                 | 6      | (a) Give the eligibility criteria, and the sources and methods of selection of participants. Describe methods of follow-up                                                           | 5                  |
|                              |        | (b) For matched studies, give matching criteria and number of exposed and unexposed                                                                                                  |                    |
| Variables                    | 7      | Clearly define all outcomes, exposures, predictors, potential confounders, and effect modifiers. Give diagnostic criteria, if applicable                                             | 6                  |
| Data sources/<br>measurement | 8*     | For each variable of interest, give sources of data and details of methods of assessment (measurement). Describe comparability of assessment methods if there is more than one group | 5                  |
| Bias                         | 9      | Describe any efforts to address potential sources of bias                                                                                                                            | 6                  |
| Study size                   | 10     | Explain how the study size was arrived at                                                                                                                                            | 6                  |
| Quantitative variables       | 11     | Explain how quantitative variables were handled in the analyses. If applicable, describe which groupings were chosen and why                                                         | 6                  |
| Statistical methods          | 12     | (a) Describe all statistical methods, including those used to control for confounding                                                                                                | 6                  |
|                              |        | (b) Describe any methods used to examine subgroups and interactions                                                                                                                  | 6                  |
|                              |        | (c) Explain how missing data were addressed                                                                                                                                          | 6; 23              |
|                              |        | (d) If applicable, explain how loss to follow-up was addressed                                                                                                                       | 6                  |
|                              |        | (e) Describe any sensitivity analyses                                                                                                                                                | 6                  |
| <b>Results</b>               |        |                                                                                                                                                                                      |                    |

|                          |     |                                                                                                                                                                                                              |              |
|--------------------------|-----|--------------------------------------------------------------------------------------------------------------------------------------------------------------------------------------------------------------|--------------|
| Participants             | 13* | (a) Report numbers of individuals at each stage of study—eg numbers potentially eligible, examined for eligibility, confirmed eligible, included in the study, completing follow-up, and analysed            | 7            |
|                          |     | (b) Give reasons for non-participation at each stage                                                                                                                                                         | 7            |
|                          |     | (c) Consider use of a flow diagram                                                                                                                                                                           | 7            |
| Descriptive data         | 14* | (a) Give characteristics of study participants (eg demographic, clinical, social) and information on exposures and potential confounders                                                                     | 7, 19, 27    |
|                          |     | (b) Indicate number of participants with missing data for each variable of interest                                                                                                                          | 23           |
|                          |     | (c) Summarise follow-up time (eg, average and total amount)                                                                                                                                                  | 6, 18, 22    |
| Outcome data             | 15* | Report numbers of outcome events or summary measures over time                                                                                                                                               | 8            |
| Main results             | 16  | (a) Give unadjusted estimates and, if applicable, confounder-adjusted estimates and their precision (eg, 95% confidence interval). Make clear which confounders were adjusted for and why they were included | 8,20, 21, 24 |
|                          |     | (b) Report category boundaries when continuous variables were categorized                                                                                                                                    |              |
|                          |     | (c) If relevant, consider translating estimates of relative risk into absolute risk for a meaningful time period                                                                                             |              |
| Other analyses           | 17  | Report other analyses done—eg analyses of subgroups and interactions, and sensitivity analyses                                                                                                               | 8, 22        |
| <b>Discussion</b>        |     |                                                                                                                                                                                                              |              |
| Key results              | 18  | Summarise key results with reference to study objectives                                                                                                                                                     | 9            |
| <b>Limitations</b>       |     |                                                                                                                                                                                                              |              |
| Interpretation           | 20  | Give a cautious overall interpretation of results considering objectives, limitations, multiplicity of analyses, results from similar studies, and other relevant evidence                                   | 9,10,11,12   |
| Generalisability         | 21  | Discuss the generalisability (external validity) of the study results                                                                                                                                        | 9,10,11,12   |
| <b>Other information</b> |     |                                                                                                                                                                                                              |              |
| Funding                  | 22  | Give the source of funding and the role of the funders for the present study and, if applicable, for the original study on which the present article is based                                                | 13           |

\*Give information separately for cases and controls in case-control studies and, if applicable, for exposed and unexposed groups in cohort and cross-sectional studies.

**Note:** An Explanation and Elaboration article discusses each checklist item and gives methodological background and published examples of transparent reporting. The STROBE checklist is best used in conjunction with this article (freely available on the Web sites of PLoS Medicine at <http://www.plosmedicine.org/>, Annals of Internal Medicine at <http://www.annals.org/>, and Epidemiology at <http://www.epidem.com/>). Information on the STROBE Initiative is available at [www.strobe-statement.org](http://www.strobe-statement.org).
