# Supplementary material for: Cardiovascular risk factors and COVID-19 outcomes in hospitalised patients: a prospective cohort study
Source: PubMed Central journal article supplement (PMC7902321; doi:10.1136/bmjopen-2020-045482), 2021-02-22
Supplement: bmjopen-2020-045482supp001.pdf [file bmjopen-2020-045482supp001.pdf]

**Supplement 1: Baseline characteristics in subset with detailed clinical history**

In three of the participating hospitals (Amsterdam UMC location AMC, Amsterdam UMC location VUMC, Flevoziekenhuis), we collected additional clinical information to validate the medication use as surrogate marker for cardiovascular risk factors and disease, depicted in the table below.

**Supplementary table:** Baseline characteristics of complete cohort, and subgroup where additional information about prior cardiovascular events was available.

| n                                                    | Overall<br>1604 | Subset<br>566 |
|------------------------------------------------------|-----------------|---------------|
| Age (mean (SD))                                      | 65.67 (15.06)   | 61.37 (14.60) |
| Women                                                | 633 (39.5)      | 241 (42.6)    |
| Chronic cardiac disease                              | 467 (29.2)      | 125 (22.1)    |
| Hypertension                                         | 734 (46.0)      | 252 (44.8)    |
| Chronic pulmonary disease                            | 288 (18.0)      | 77 (13.6)     |
| Asthma                                               | 179 (11.2)      | 56 (9.9)      |
| Chronic kidney disease                               | 150 (9.4)       | 57 (10.1)     |
| Diabetes                                             | 411 (25.7)      | 154 (27.2)    |
| Malignant neoplasm                                   | 98 (6.2)        | 31 (5.5)      |
| Chronic hematologic disorder                         | 57 (3.6)        | 23 (4.1)      |
| Smoking                                              | 78 (6.5)        | 28 (6.2)      |
| Obesity                                              | 464 (30.8)      | 168 (32.8)    |
| Combined use of beta-blockers and antiplatelet drugs | 167 (10.4)      | 50 (8.8)      |
| History of coronary artery disease                   |                 | 74 (13.1)     |
| History of heart failure                             |                 | 21 (3.7)      |
| History of stroke                                    |                 | 42 (7.4)      |
| History of peripheral artery disease                 |                 | 9 (1.6)       |
| Antihypertensive-Rx                                  |                 |               |
| 0                                                    | 883 (55.0)      | 327 (57.8)    |
| 1                                                    | 377 (23.5)      | 126 (22.3)    |
| 2                                                    | 282 (17.6)      | 81 (14.3)     |
| ≥ 3                                                  | 62 (3.9)        | 32 (5.7)      |
| Lipid-lowering-Rx                                    |                 |               |
| 0                                                    | 1047 (65.3)     | 399 (70.5)    |
| ≥ 1                                                  | 557 (34.7)      | 167 (29.5)    |
| Glucose-lowering-Rx                                  |                 |               |
| 0                                                    | 1250 (77.9)     | 435 (76.9)    |
| 1                                                    | 170 (10.6)      | 60 (10.6)     |
| ≥ 2                                                  | 184 (11.5)      | 71 (12.5)     |

RF, risk factor; SD, standard deviation; IQR, interquartile range, Rx medication.

Cox-regression for the effect of the number of antihypertensive, lipid-lowering and antidiabetic drug classes on mortality. Table depicts results from multivariate analysis

including age, sex, obesity, current smoker and the use of beta-blockers and antiplatelet medication. Rx, medication; HR, hazard ratio; CI, confidence interval.
